# Supplementary material for: I2–DMSO–PTSA: a simple and metal free oxidative cross coupling of imidazo[1,2-a]pyridines and methylketones
Source: Royal Society of Chemistry journal article supplement (doi:10.1039/c4ra15835k), 2015-01-01
Supplement: c4ra15835k1.pdf [file c4ra15835k1.pdf]

Electronic Supplementary Information (ESI) for RSC Advances  
This journal is © The Royal Society of Chemistry 2015.

***Supporting Information:***

**I<sub>2</sub>-DMSO-PTSA: A simple and metal free oxidative cross coupling of imidazo[1,2-*a*]pyridines and methylketones**

Madhu Chennapuram,<sup>a</sup> Narender Reddy Emmadi,<sup>a</sup> Chiranjeevi Bingi,<sup>a</sup> and Krishnaiah Atmakur<sup>\*a,c</sup>

<sup>a</sup>Division of Crop Protection Chemicals, CSIR-Indian Institute of Chemical Technology, Tarnaka, Hyderabad 500 007, India

<sup>c</sup>AcSIR-Indian Institute of Chemical Technology, Tarnaka, Hyderabad 500 007, India.  
E-mail: krishnu@iict.res.in; Fax: +91 40 27193382; Tel: +91 40 27191436.

**Contents:**

- 1) General Experimental information: Melting points were measured by CINTEX programmable melting point apparatus and are uncorrected. <sup>1</sup>H and <sup>13</sup>C NMR spectra of samples in CDCl<sub>3</sub> and DMSO-d<sub>6</sub> were recorded on AVANCE-300 MHz and 500 MHz spectrometers. Chemical shifts (δ) are reported relative to TMS (δ = 0.0) as the internal standard. Mass spectra were recorded on ESI spectrometers. All high resolution mass spectra were recorded on the QSTARXL Hybrid MS/MS System (Applied Biosystems/MDS Sciex, Foster City, USA), equipped with an ESI source (IICT, Hyderabad). IR were recorded on Thermo Nicolet nexus 670 spectrometer using KBr pellets. TLC was performed on Merck 60 F-254 silica gel plates. The chemicals used in this work were obtained from commercial channels and were used without purification.
- 2) Spectral soft copy <sup>1</sup>H & <sup>13</sup>C NMR of **3aa-3ap** & **3ba-3ia**.

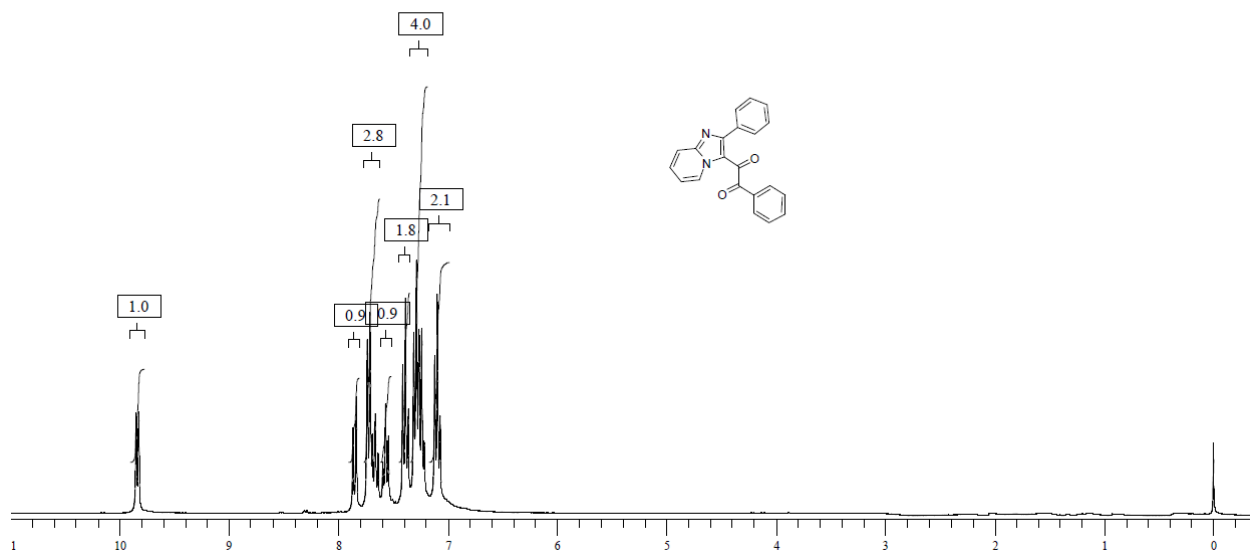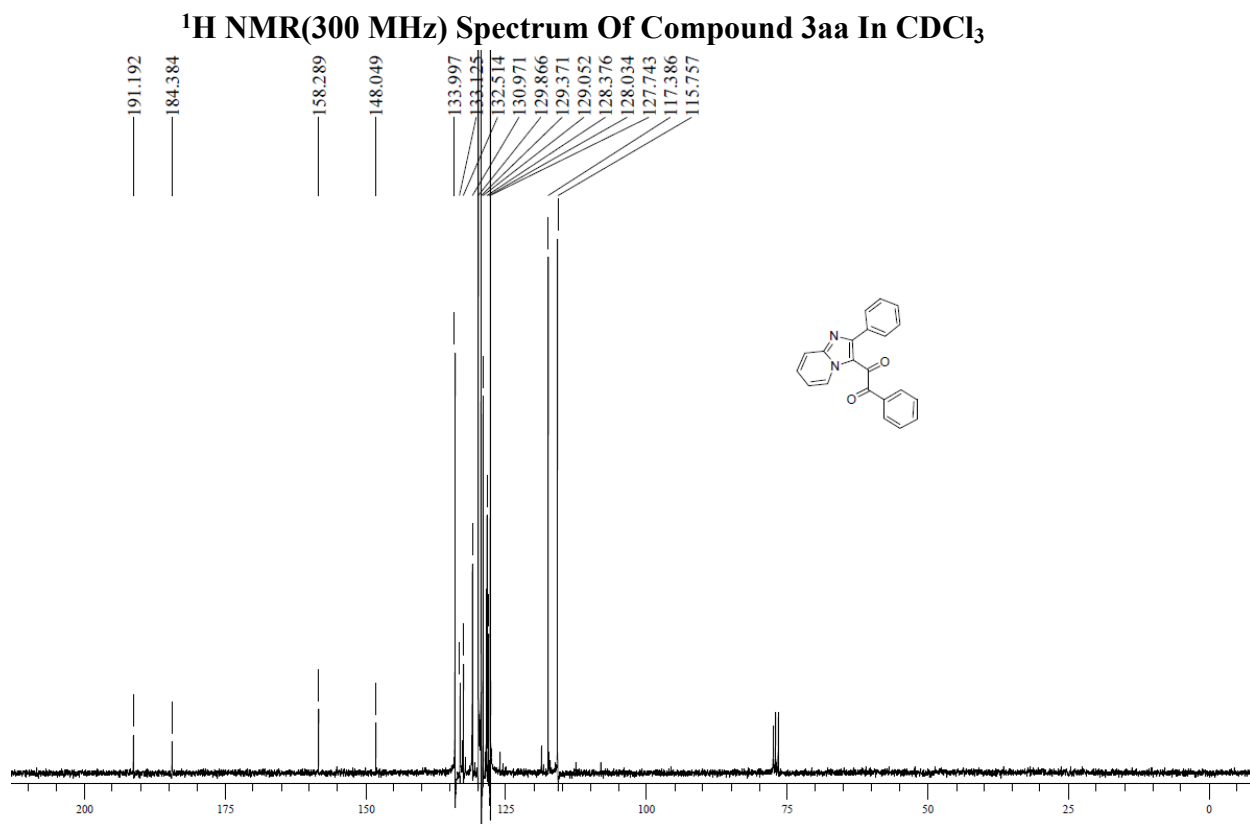

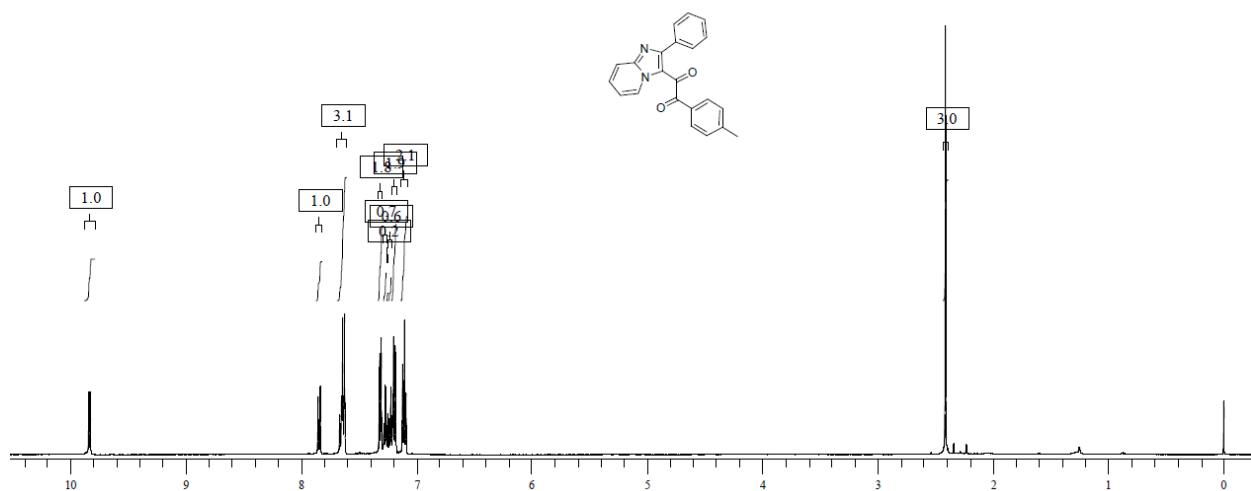

**<sup>1</sup>H NMR(500 MHz) Spectrum Of Compound 3ab In CDCl<sub>3</sub>**

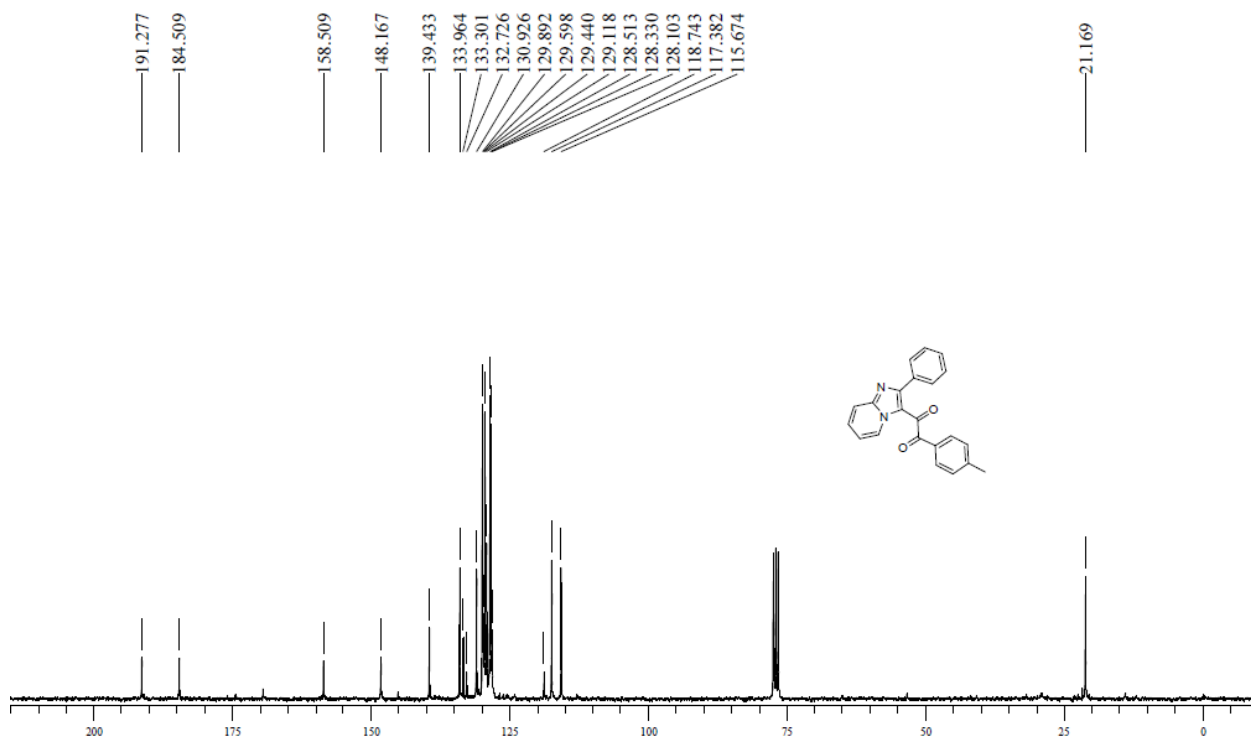

**<sup>13</sup>C NMR (125 MHz) Spectrum Of Compound 3ab In CDCl<sub>3</sub>**

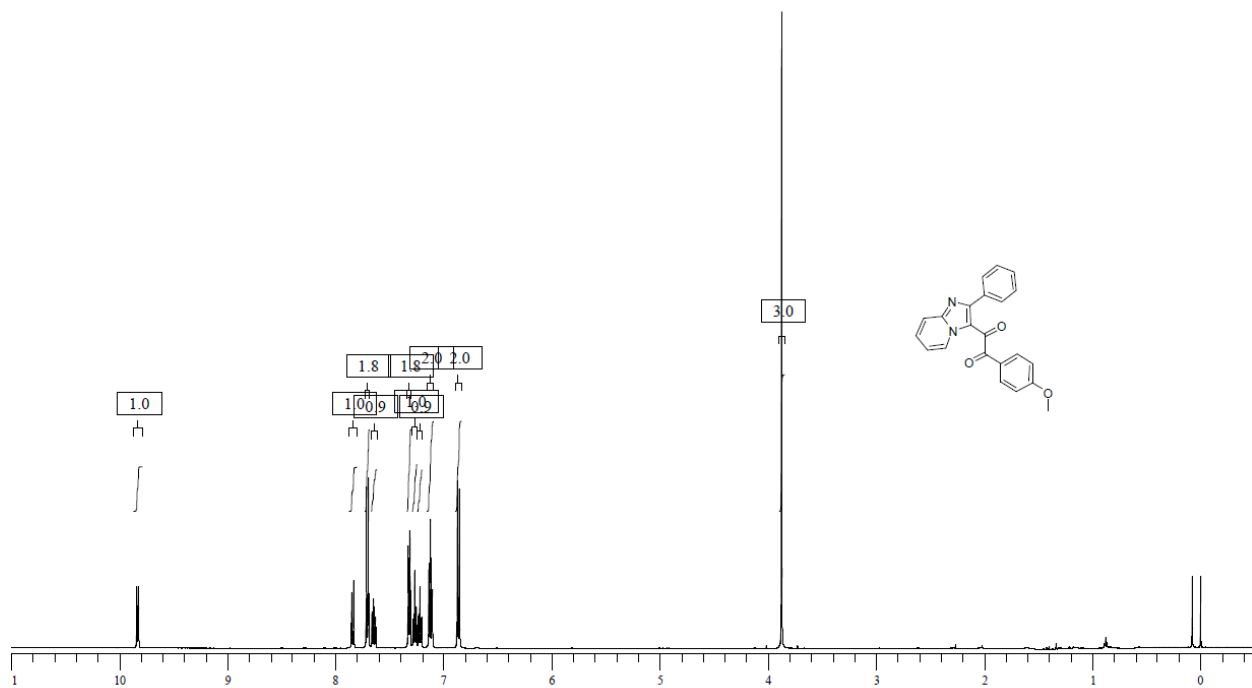

**<sup>1</sup>H NMR(500 MHz) Spectrum Of Compound 3ac In CDCl<sub>3</sub>**

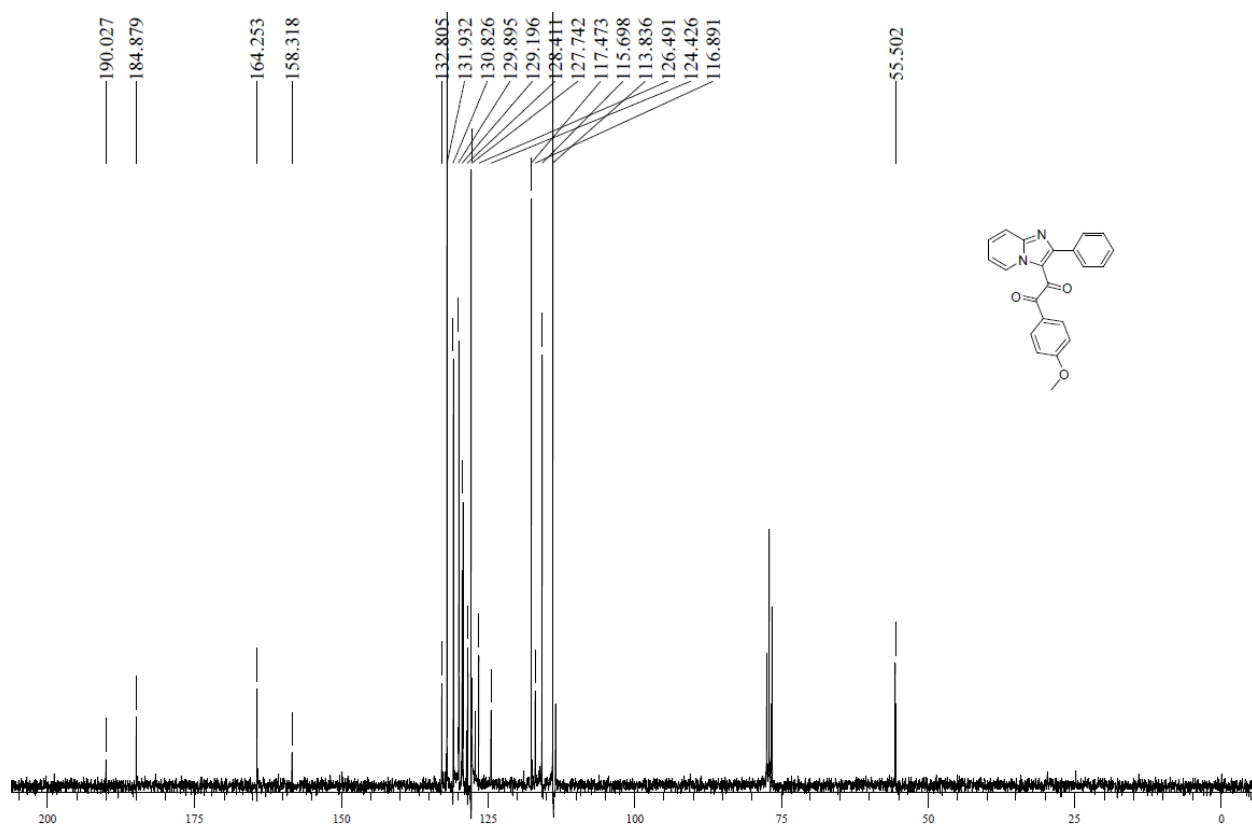

**<sup>13</sup>C NMR (125 MHz) Spectrum Of Compound 3ac In CDCl<sub>3</sub>**

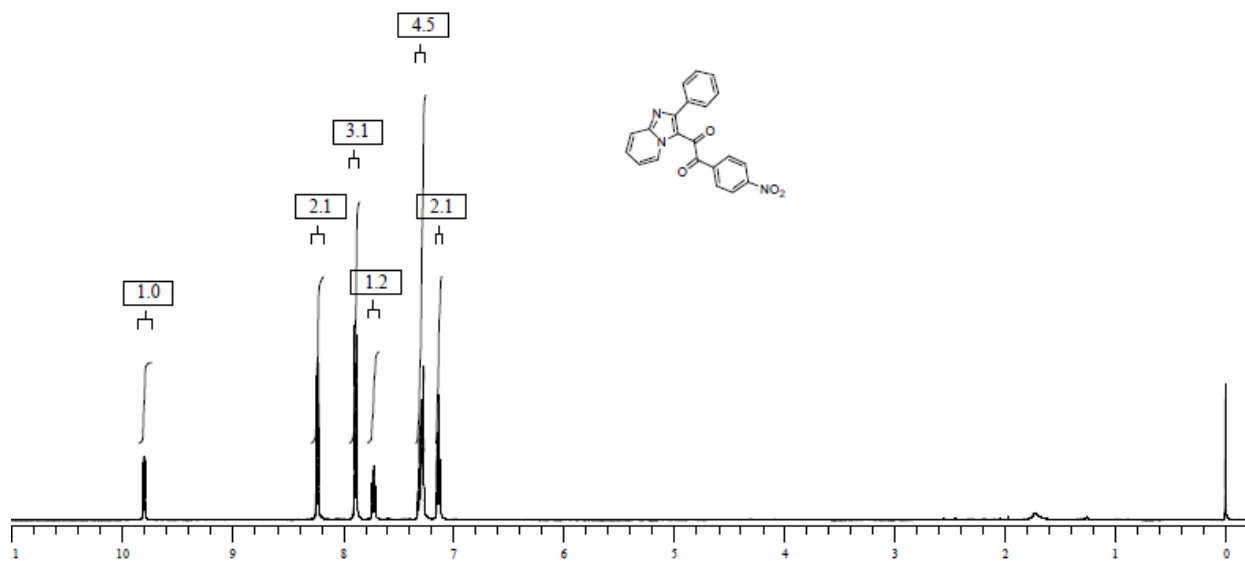

<sup>1</sup>H NMR(500 MHz) Spectrum Of Compound 3ad In CDCl<sub>3</sub>

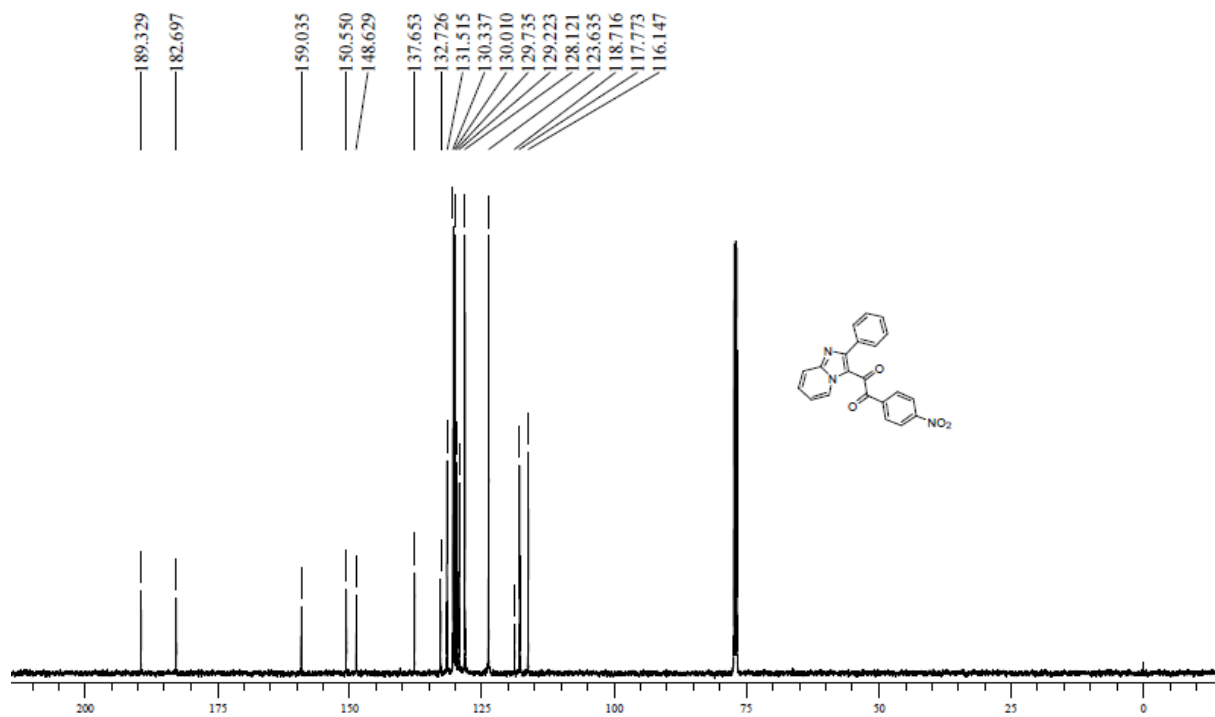

<sup>13</sup>C NMR (125 MHz) Spectrum Of Compound 3ad In CDCl<sub>3</sub>.

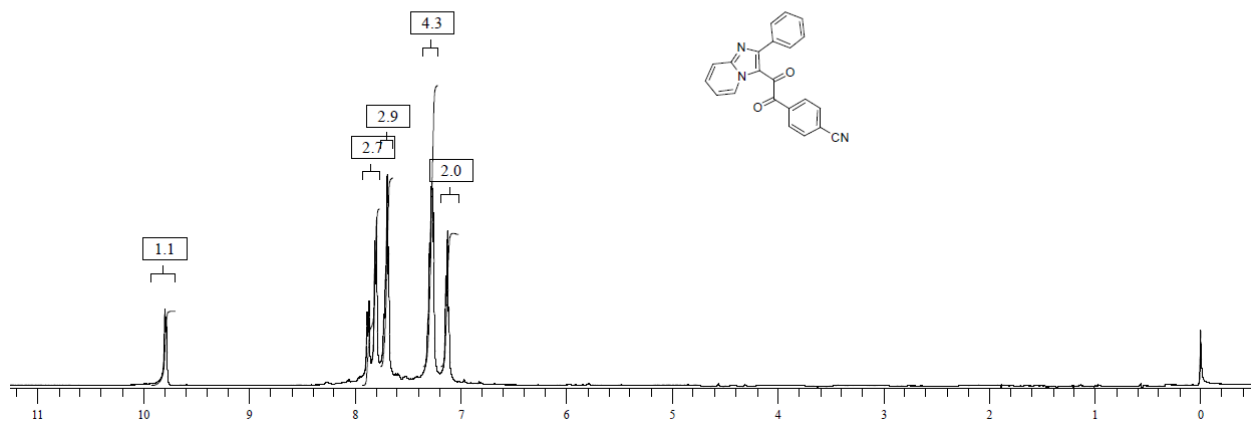

**<sup>1</sup>H NMR(500 MHz) Spectrum Of Compound 3ae In CDCl<sub>3</sub>.**

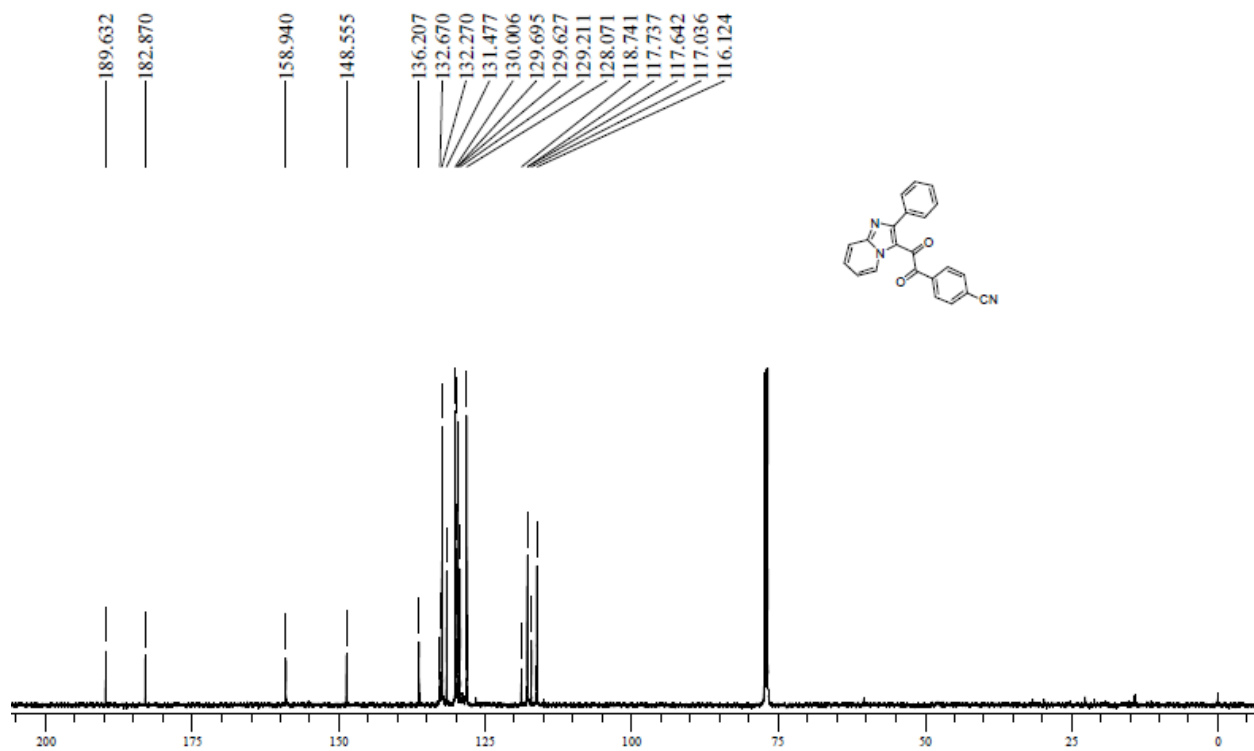

**<sup>13</sup>C NMR (125 MHz) Spectrum Of Compound 3ae In CDCl<sub>3</sub>.**

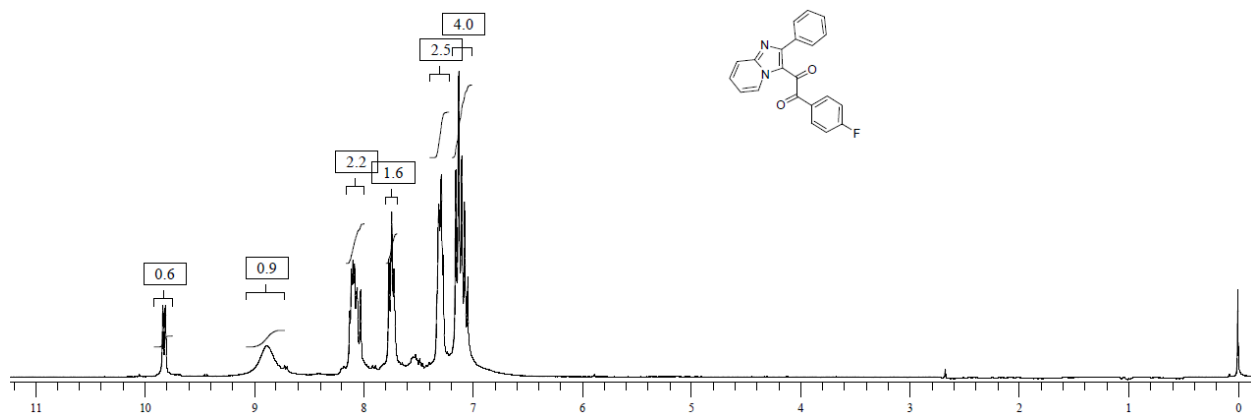

**<sup>1</sup>H NMR(500 MHz) Spectrum Of Compound 3af In CDCl<sub>3</sub>**

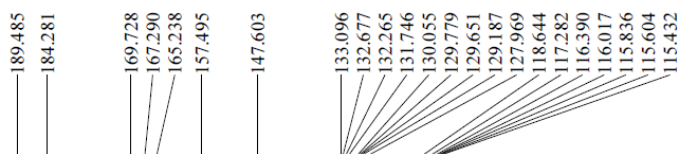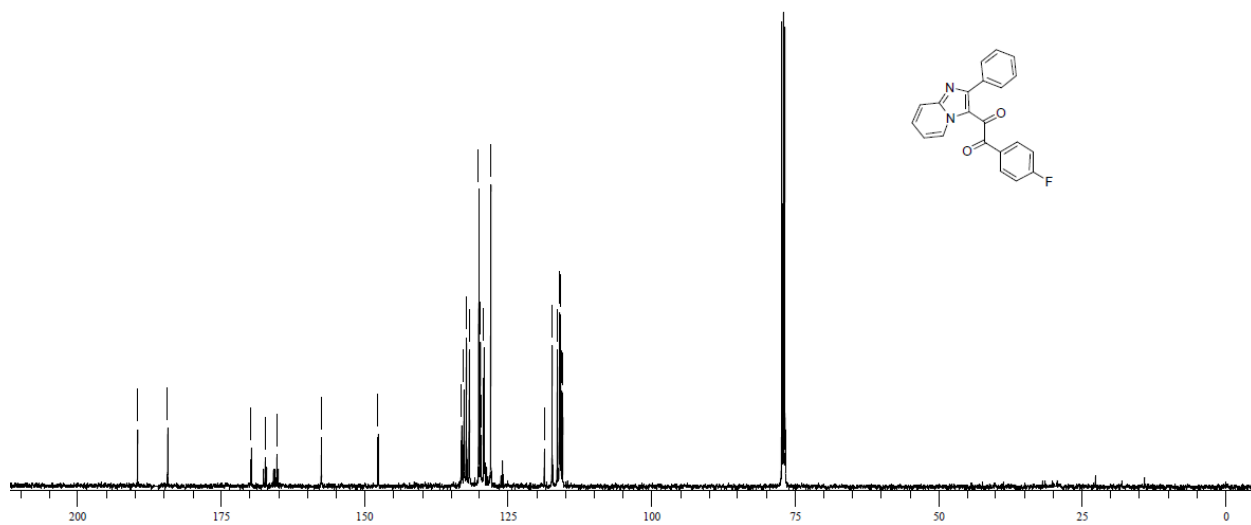

**<sup>13</sup>C NMR (125 MHz) Spectrum Of Compound 3af In CDCl<sub>3</sub>**

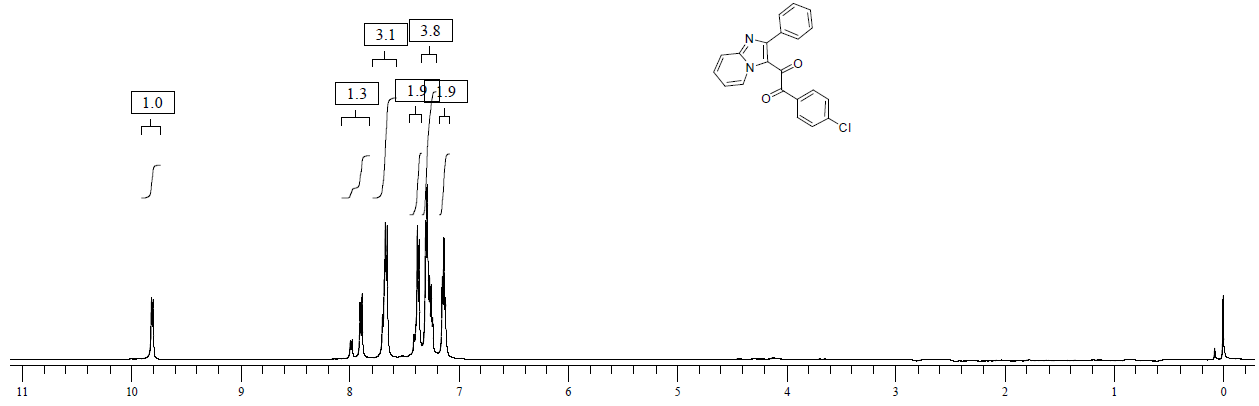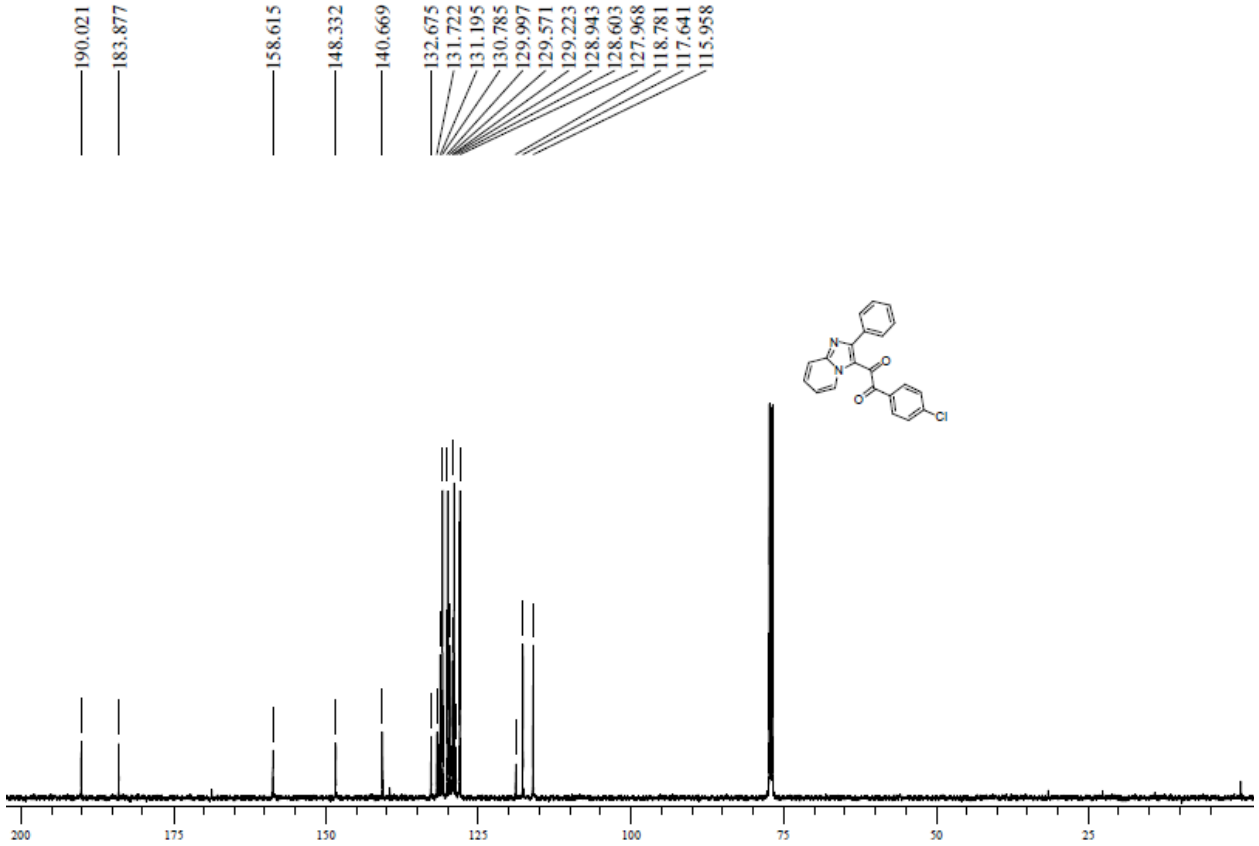



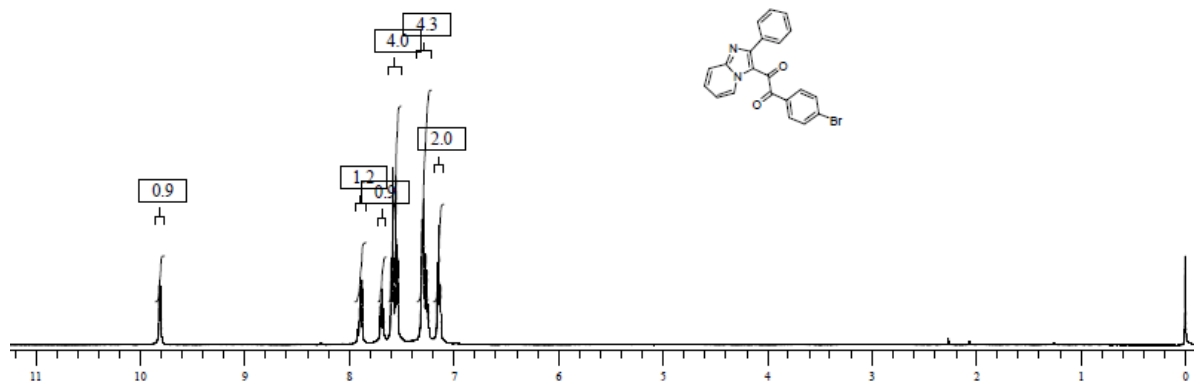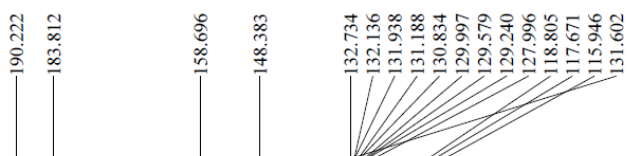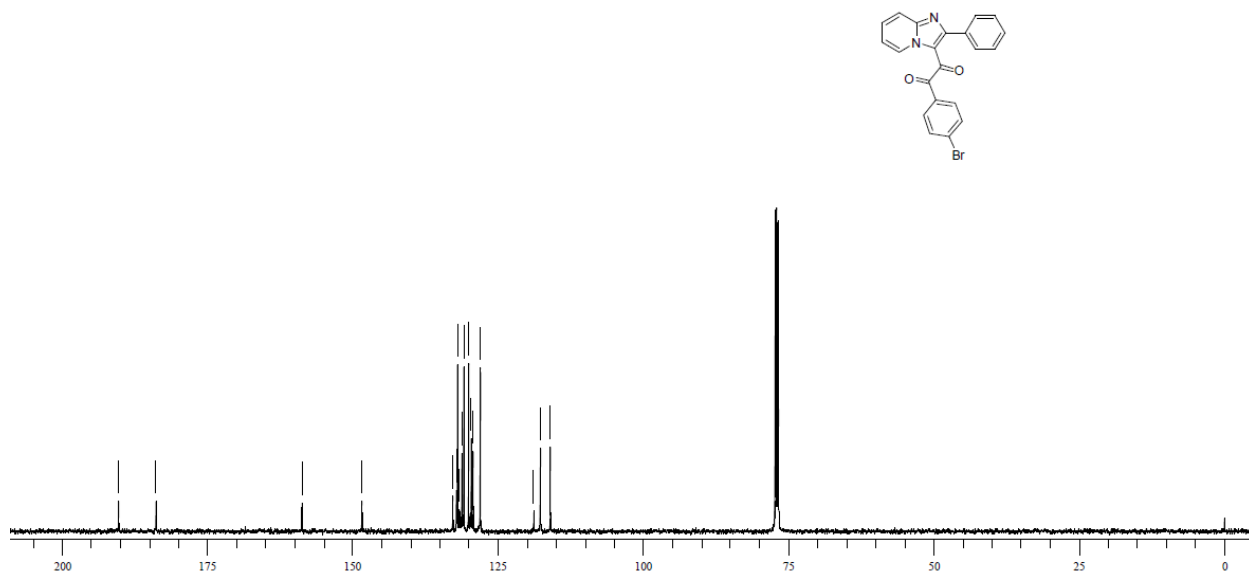

<sup>13</sup>C NMR (125 MHz) Spectrum Of Compound 3ah In CDCl<sub>3</sub>

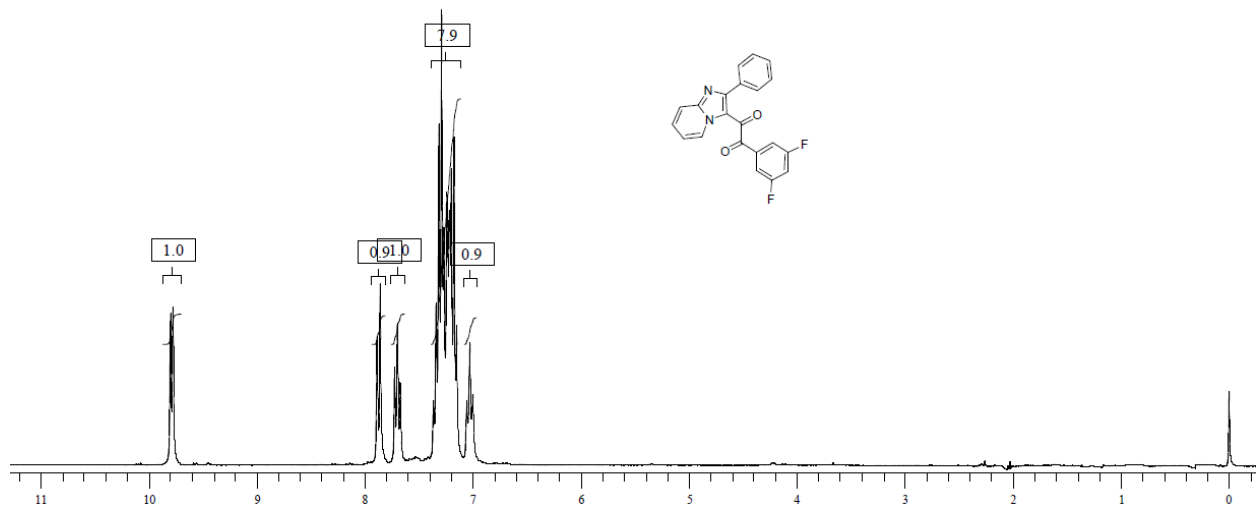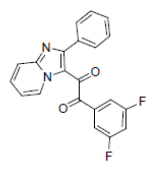

**<sup>1</sup>H NMR(500 MHz) Spectrum Of Compound 3ai In CDCl<sub>3</sub>**

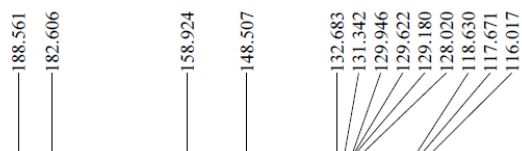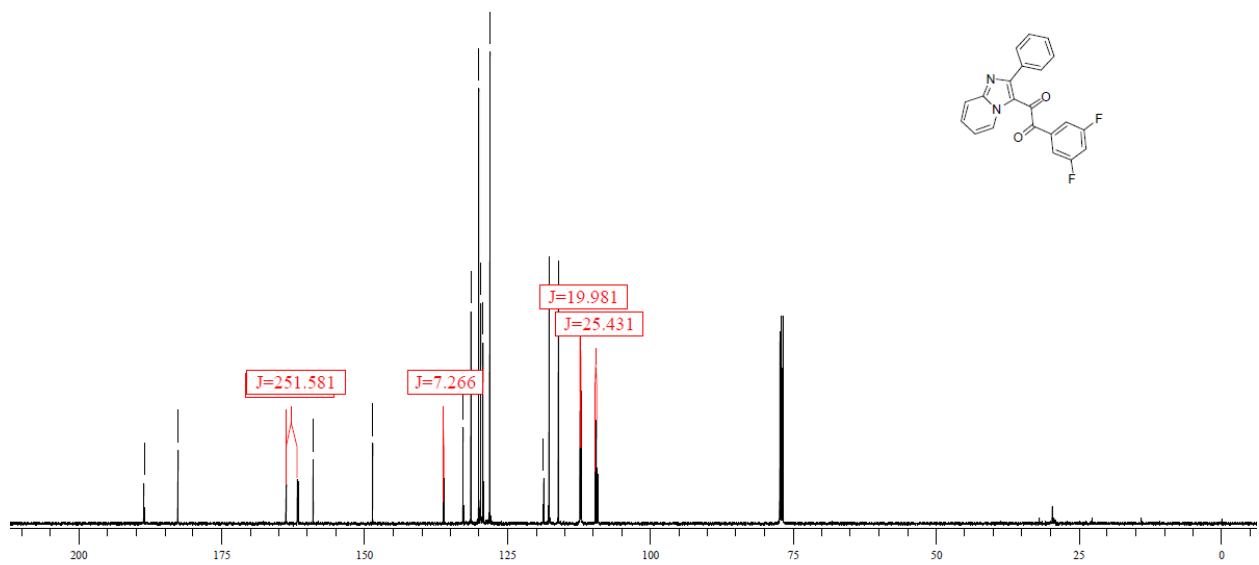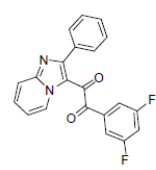

**<sup>13</sup>C NMR (125 MHz) Spectrum Of Compound 3ai In CDCl<sub>3</sub>**

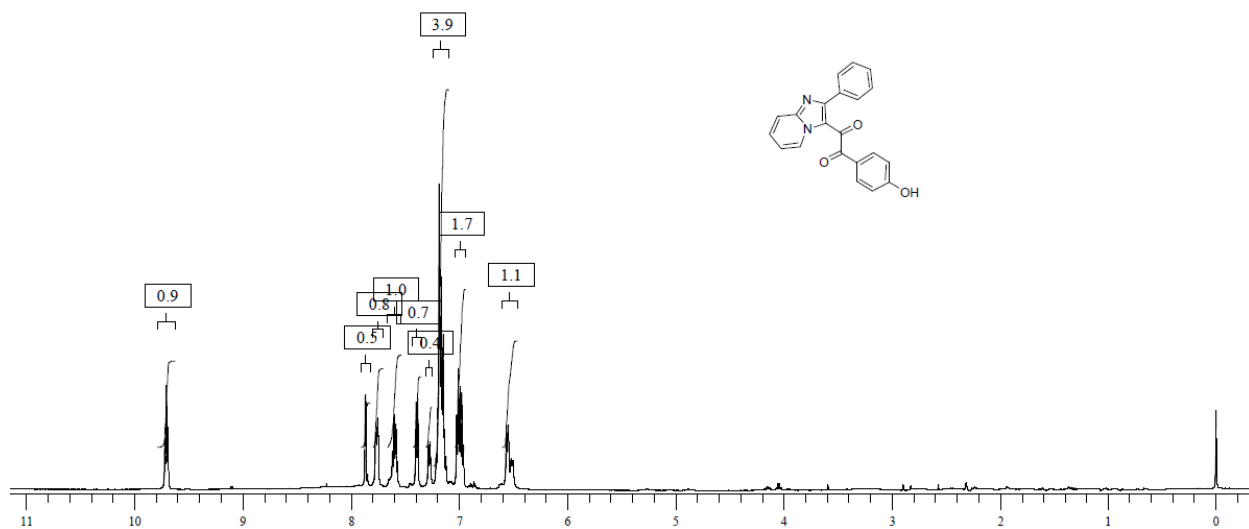

**<sup>1</sup>H NMR(500 MHz) Spectrum Of Compound 3aj In CDCl<sub>3</sub>.**

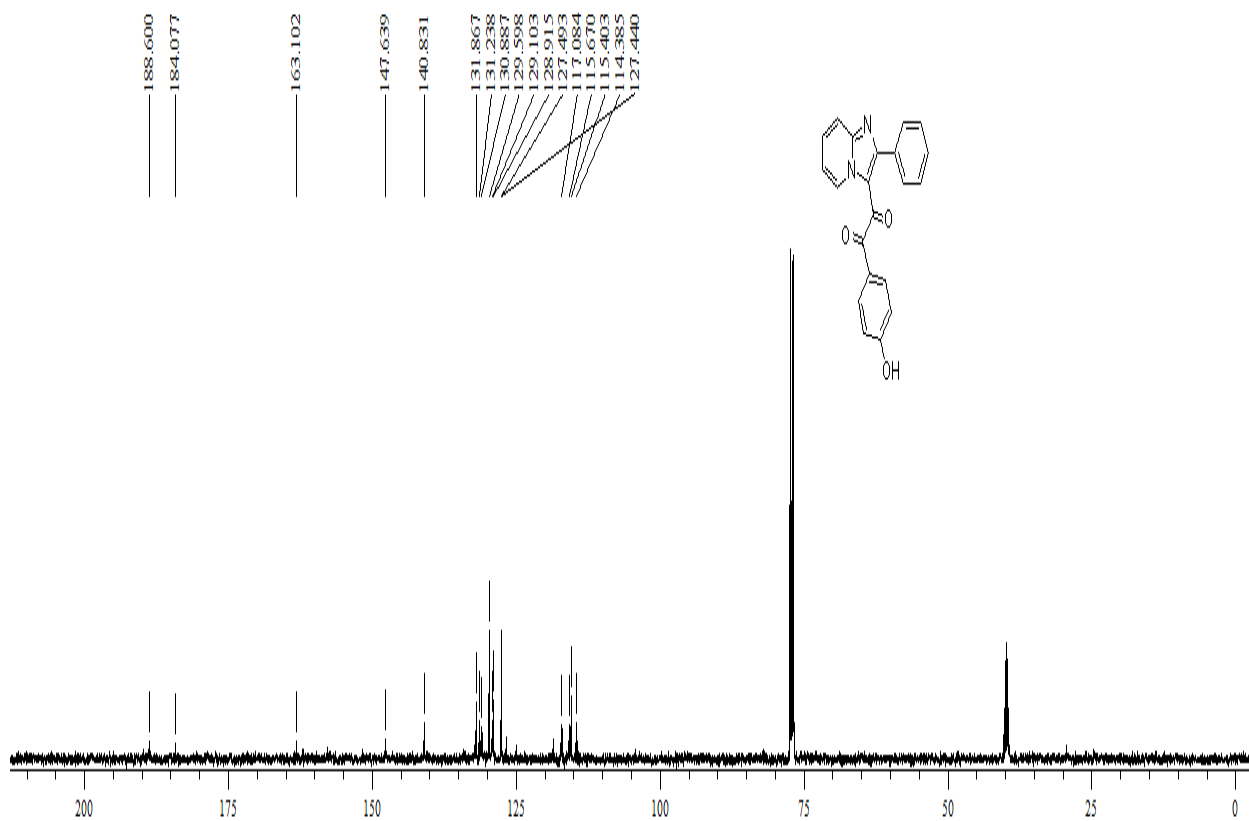

**<sup>13</sup>CNMR(75 MHz) Spectrum Of Compound 3aj In DMSO-*d*<sub>6</sub>+CDCl<sub>3</sub>**

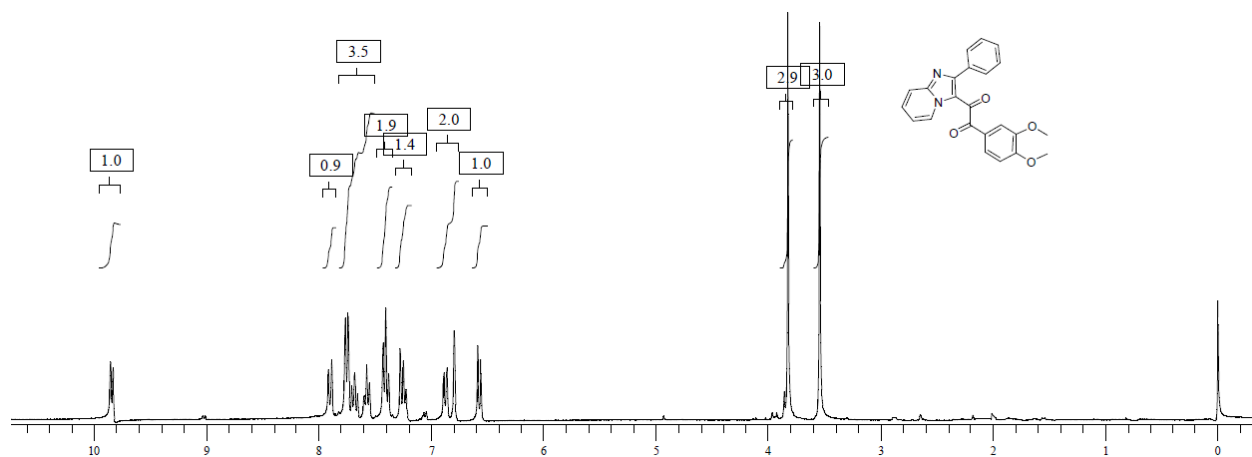

**$^1\text{H}$  NMR(300 MHz) Spectrum Of Compound 3ak In  $\text{CDCl}_3$**

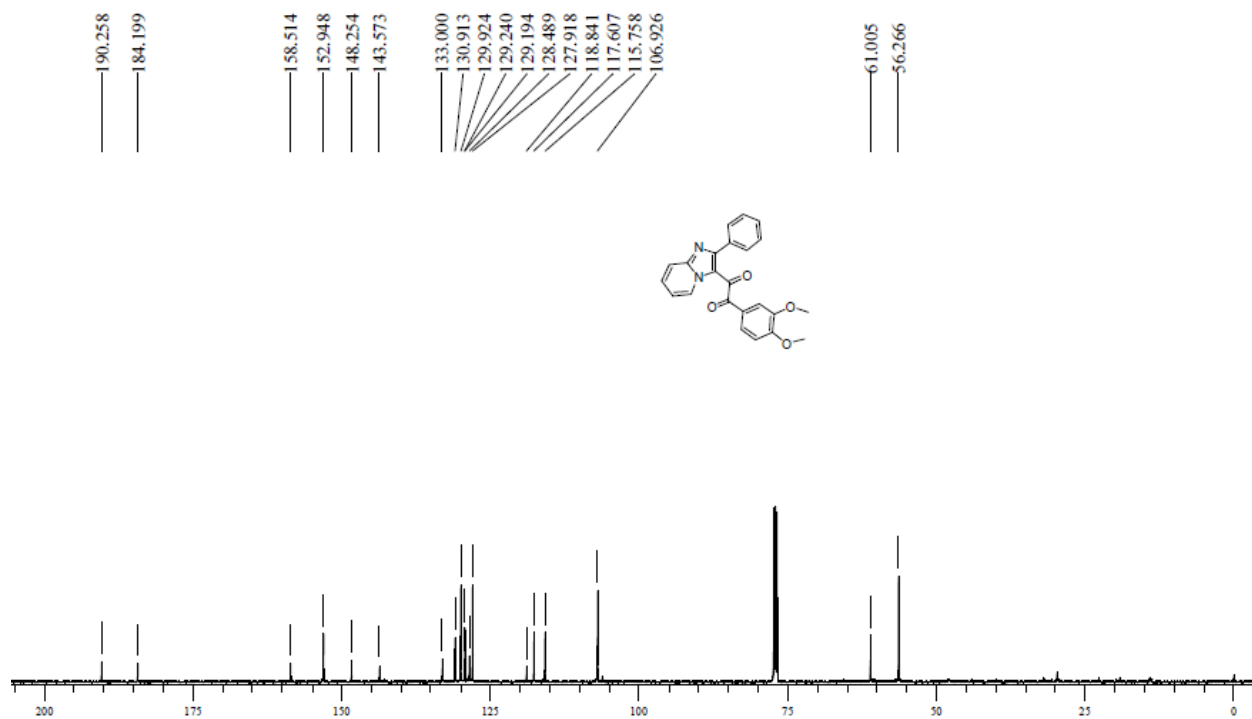

**$^{13}\text{C}$  NMR (75 MHz) Spectrum Of Compound 3ak In  $\text{CDCl}_3$**

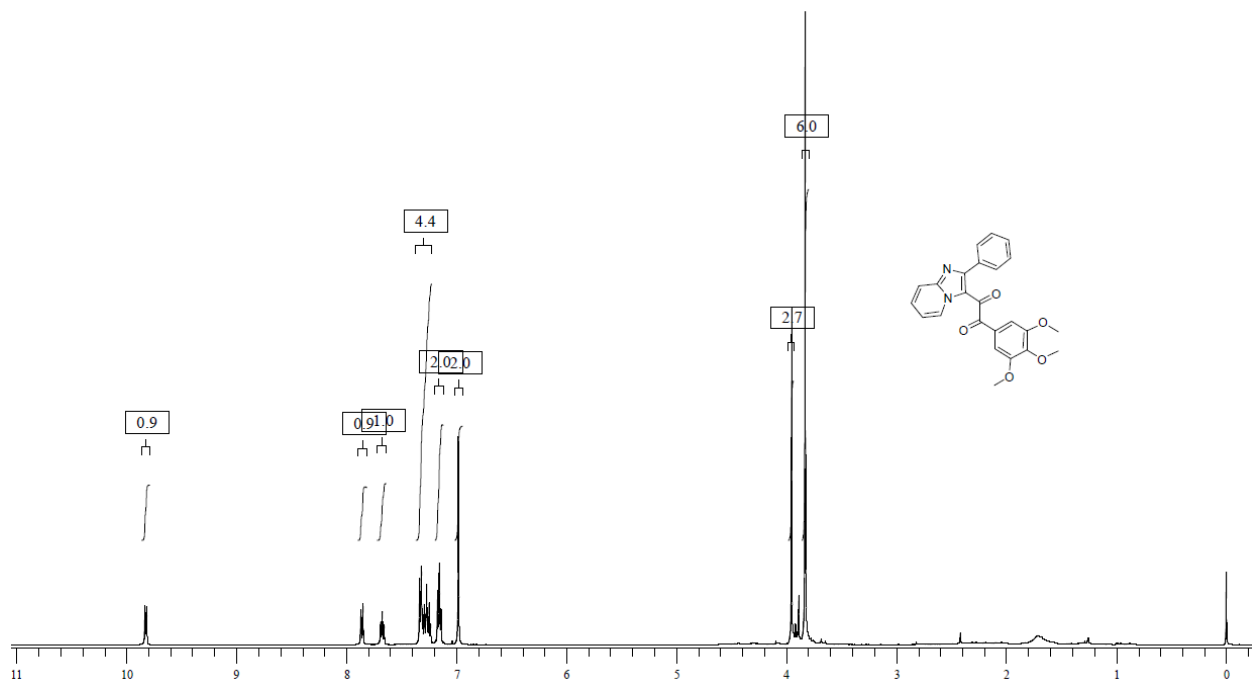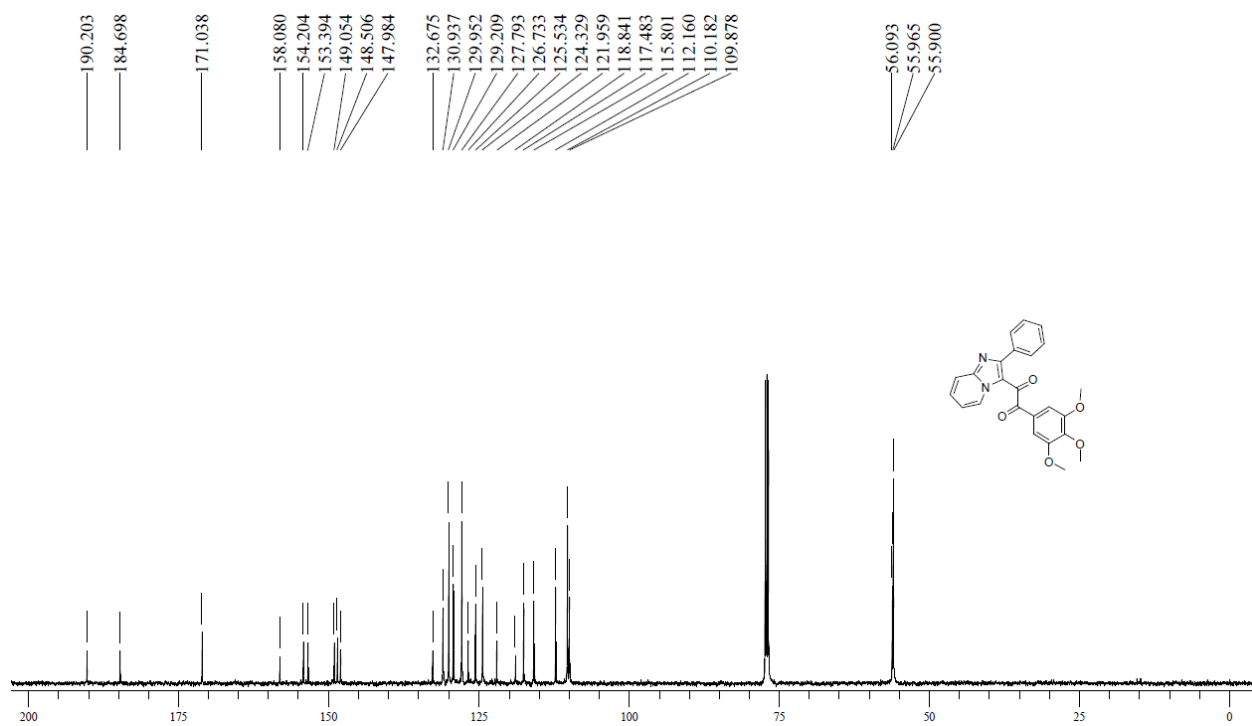

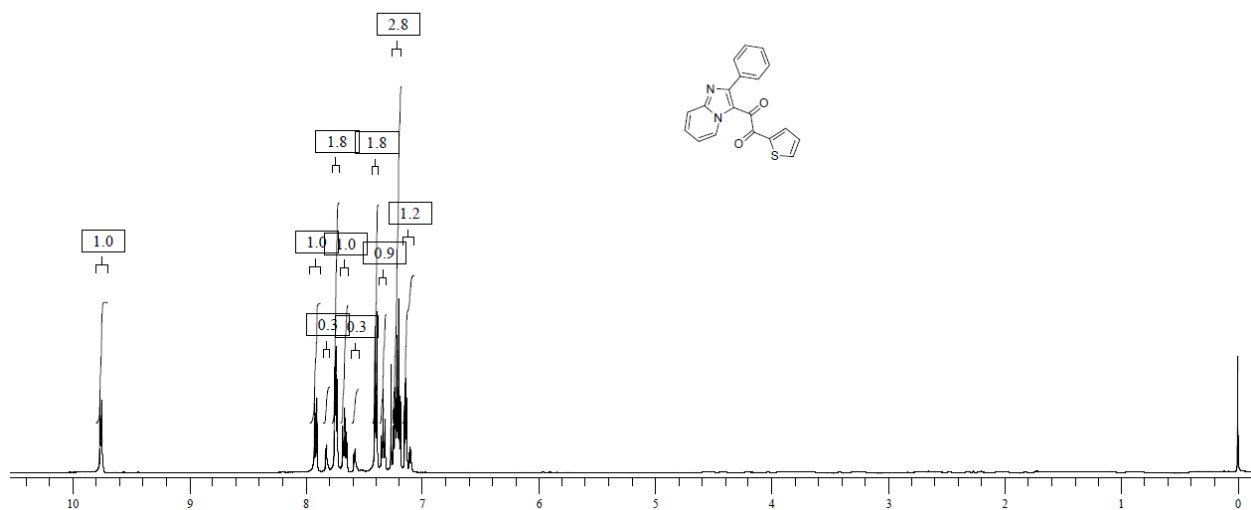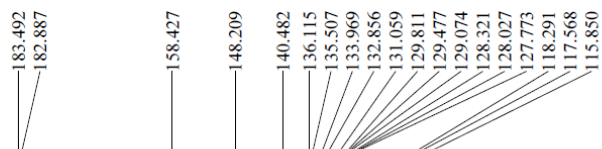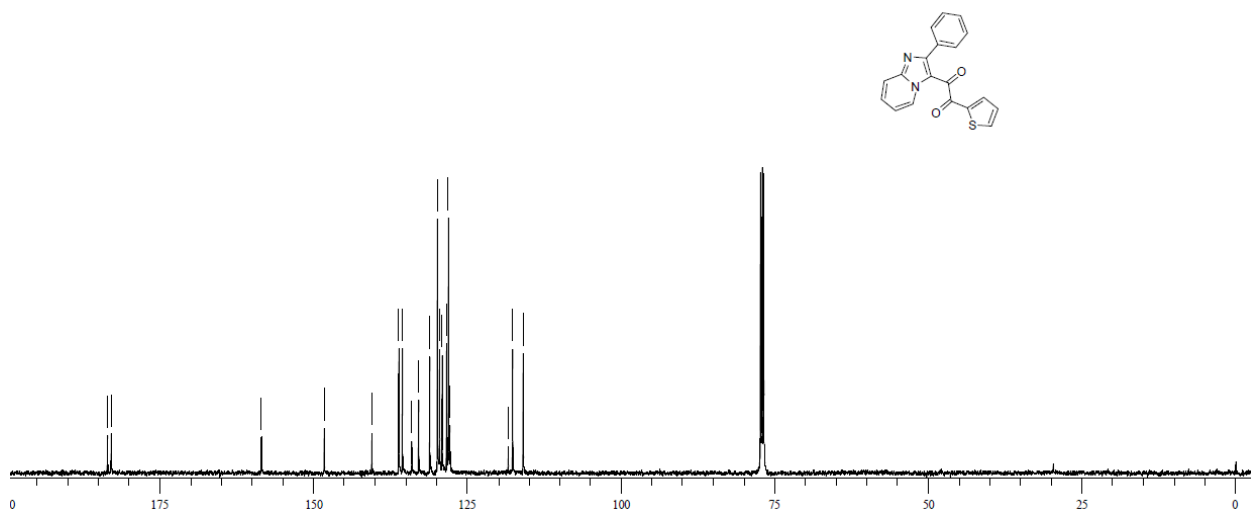

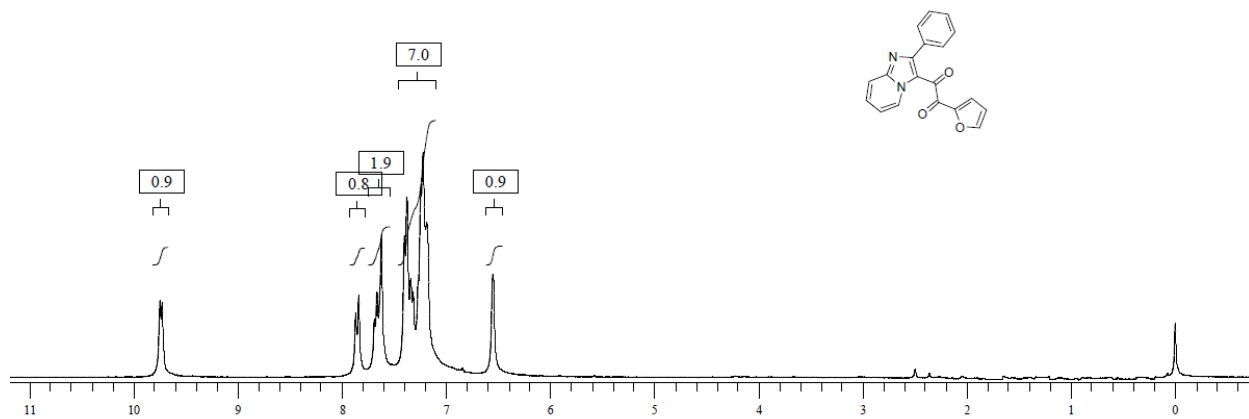

**<sup>1</sup>H NMR (300 MHz) Spectrum Of Compound 3an In CDCl<sub>3</sub>**

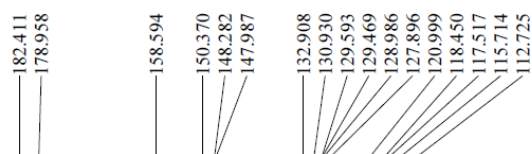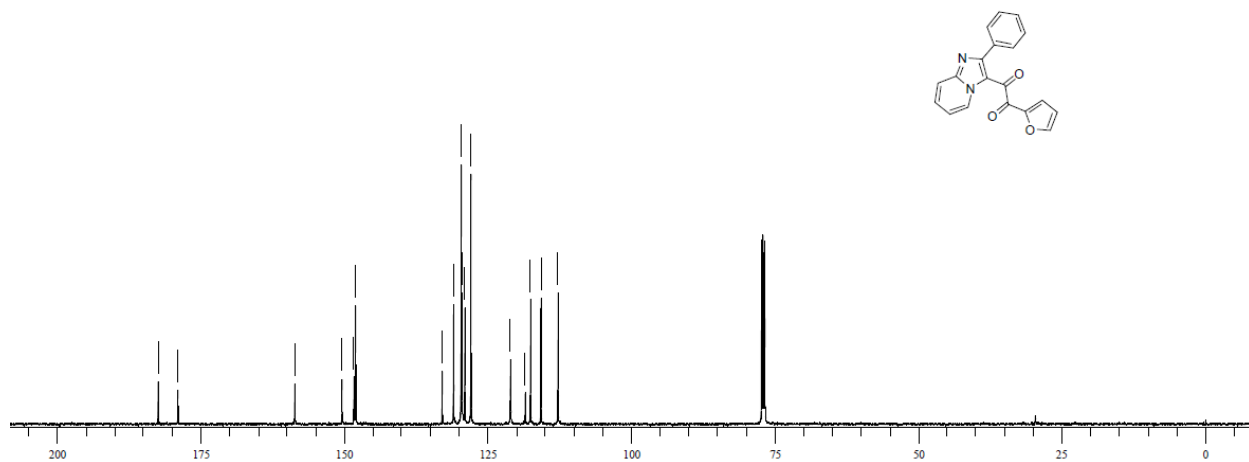

**<sup>13</sup>C NMR (125 MHz) Spectrum Of Compound 3an In CDCl<sub>3</sub>**

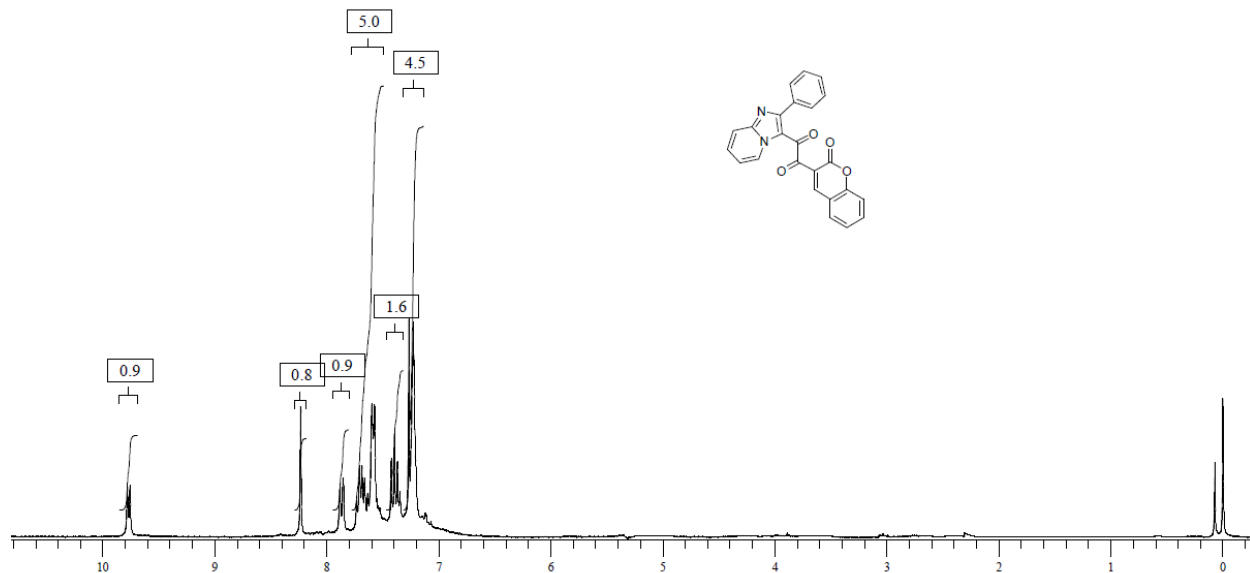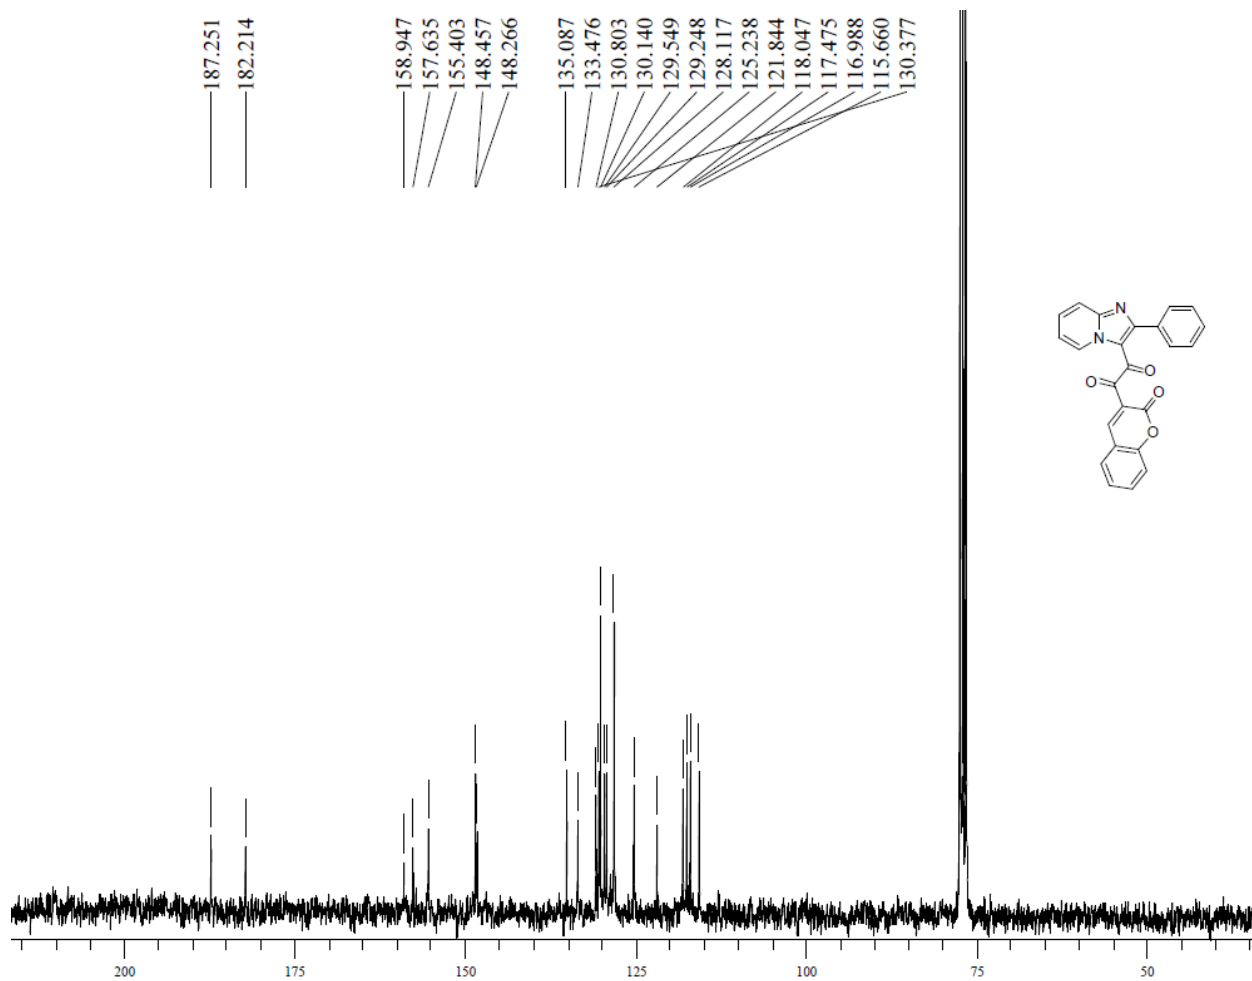



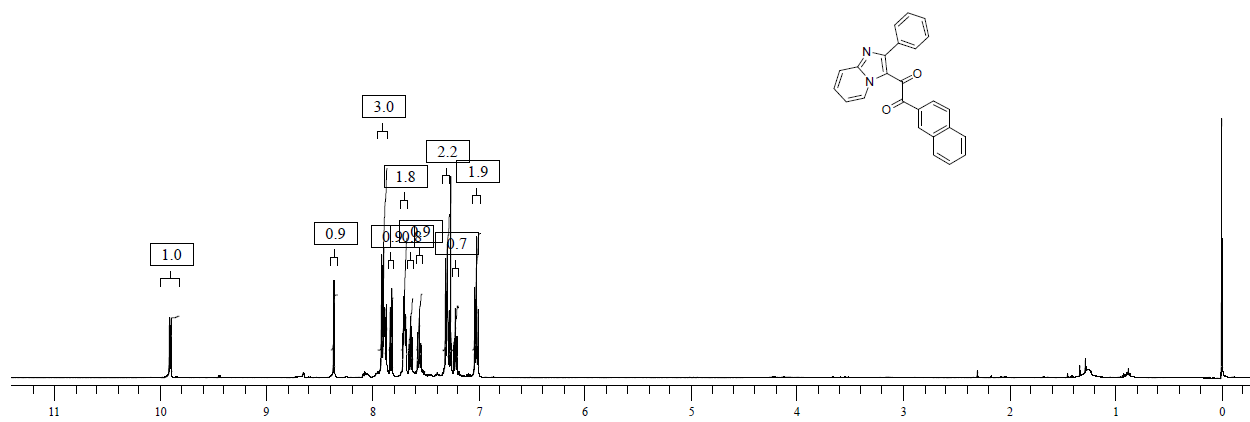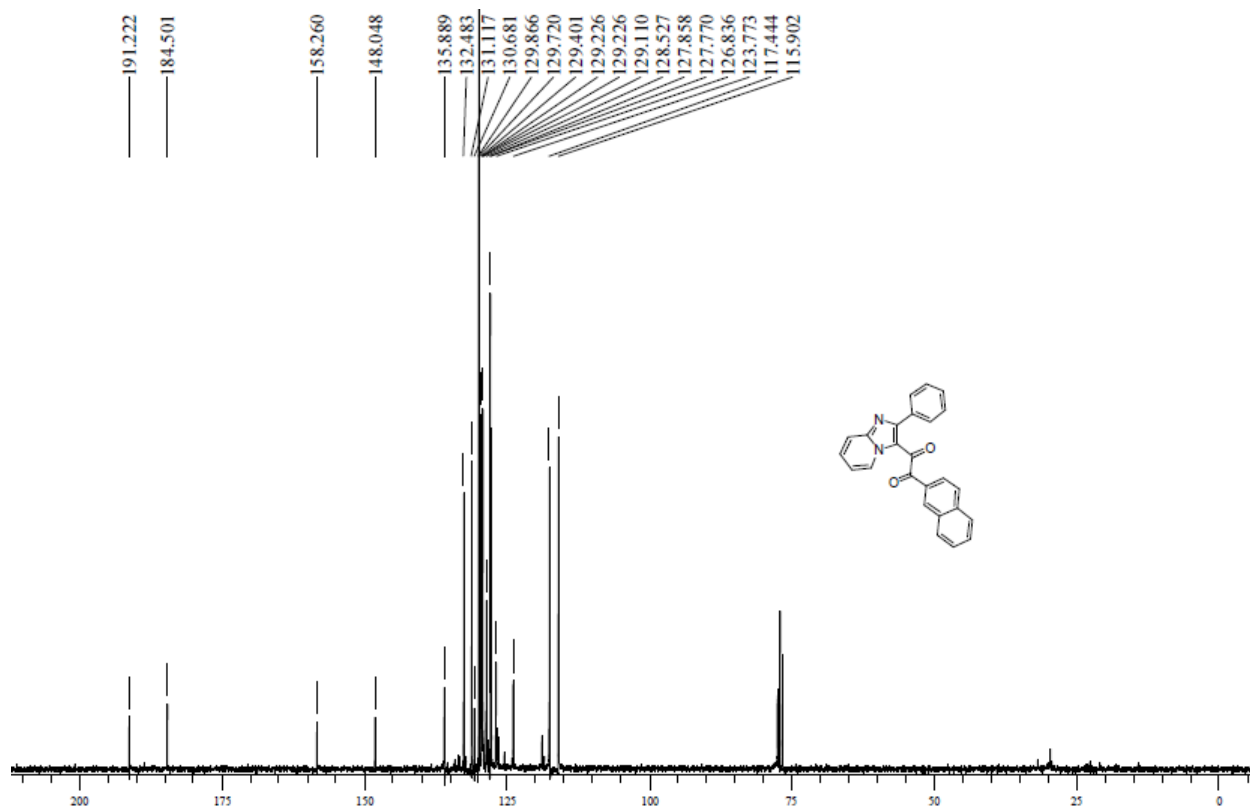

**<sup>13</sup>C NMR(125 MHz) Spectrum Of Compound 3ap In CDCl<sub>3</sub>**

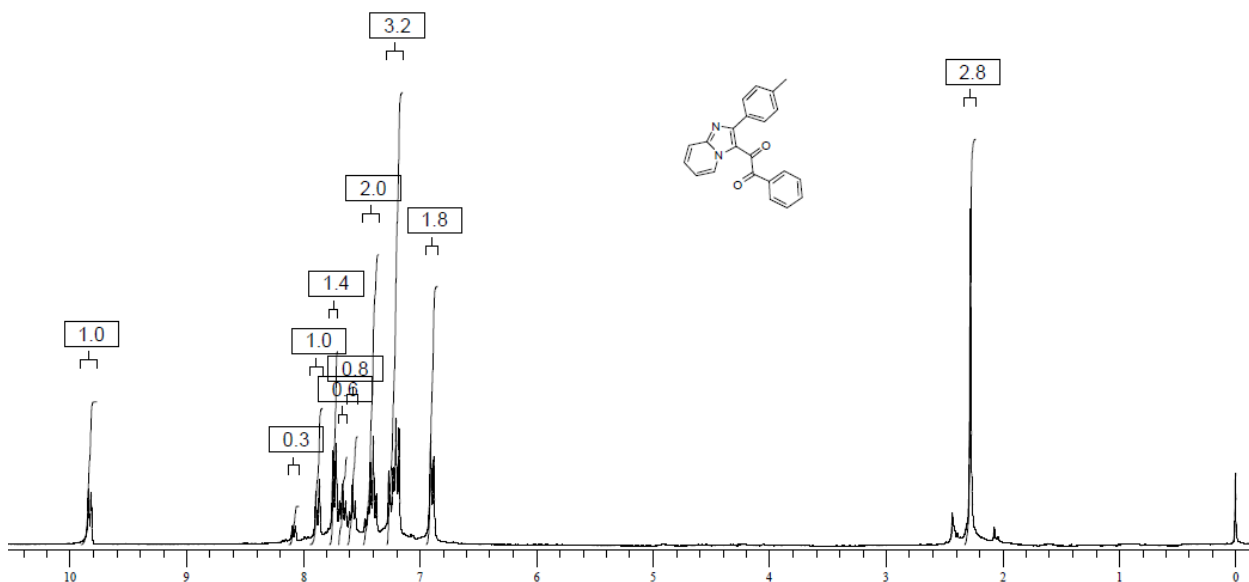

**<sup>1</sup>H NMR(500 MHz) Spectrum Of Compound 3ba In CDCl<sub>3</sub>**

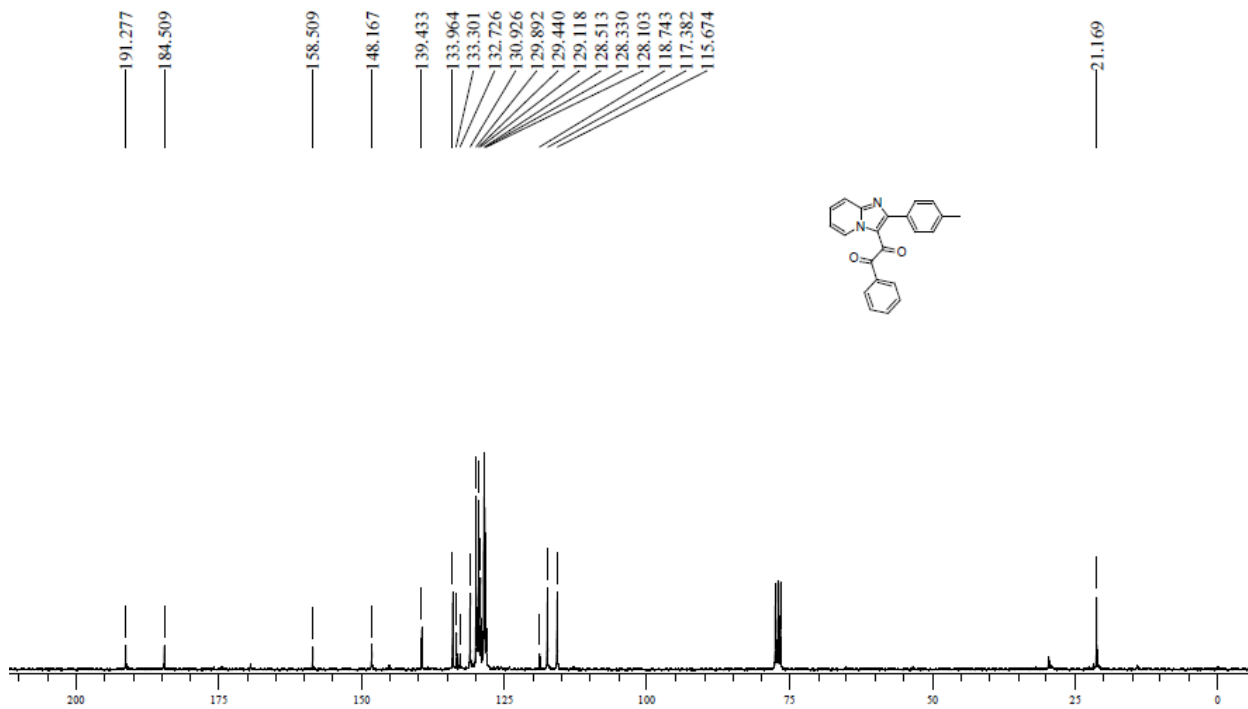

**<sup>13</sup>C NMR (125 MHz) Spectrum Of Compound 3ba In CDCl<sub>3</sub>**

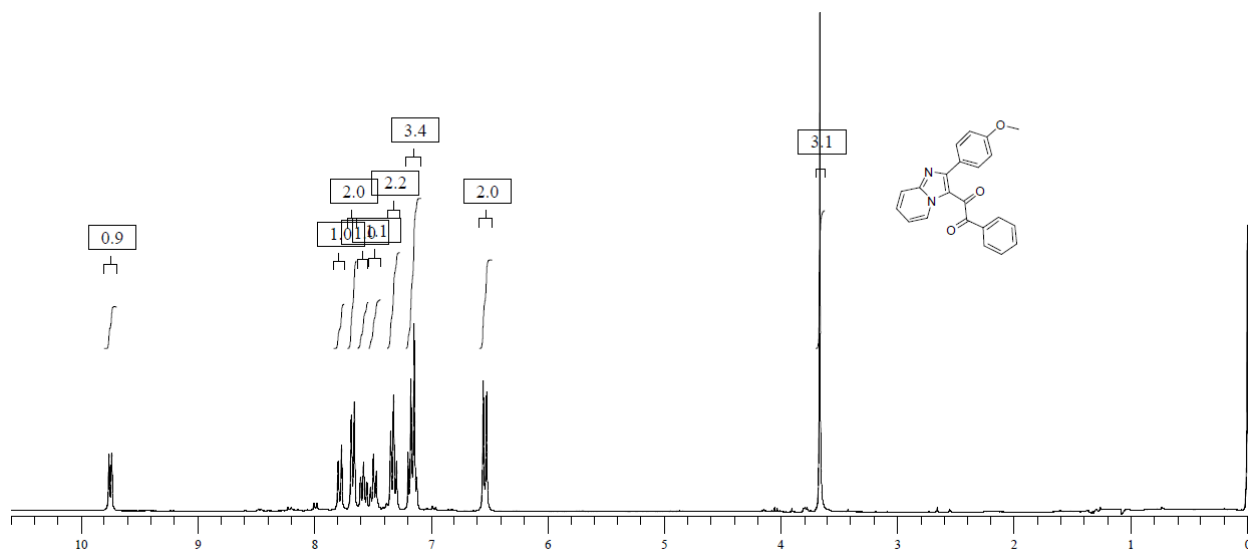

**<sup>1</sup>H NMR(300 MHz) Spectrum Of Compound 3ca In CDCl<sub>3</sub>**

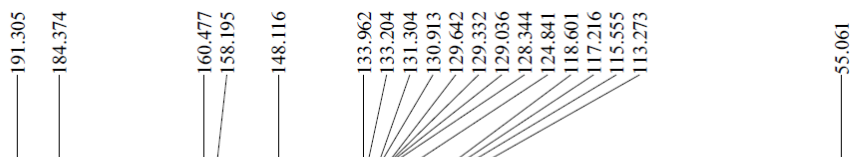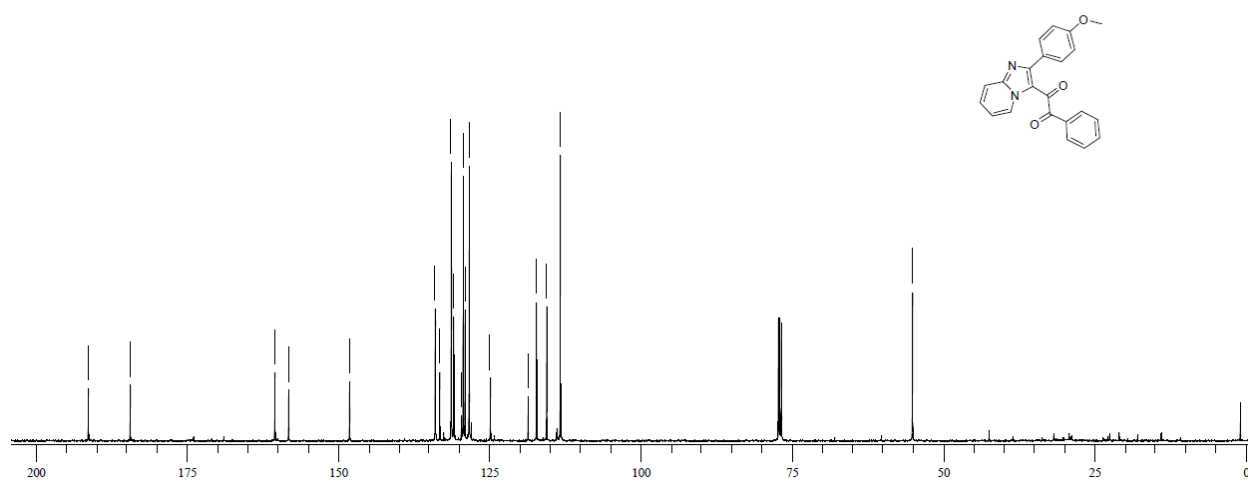

**<sup>13</sup>C NMR (125 MHz) Spectrum Of Compound 3ca In CDCl<sub>3</sub>**

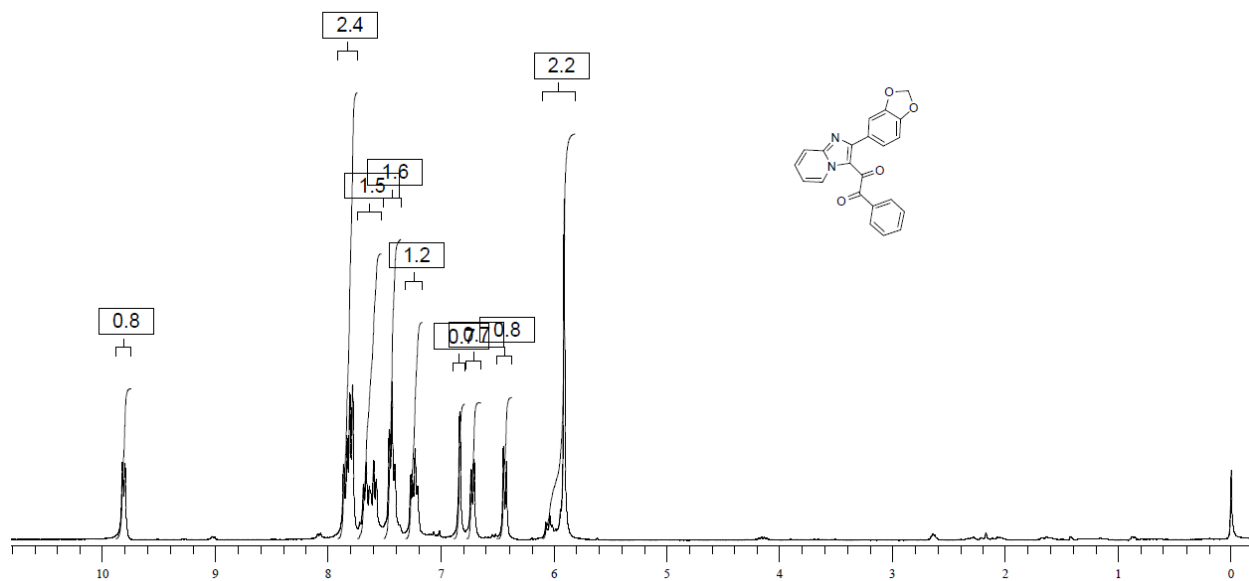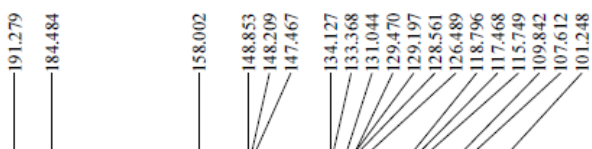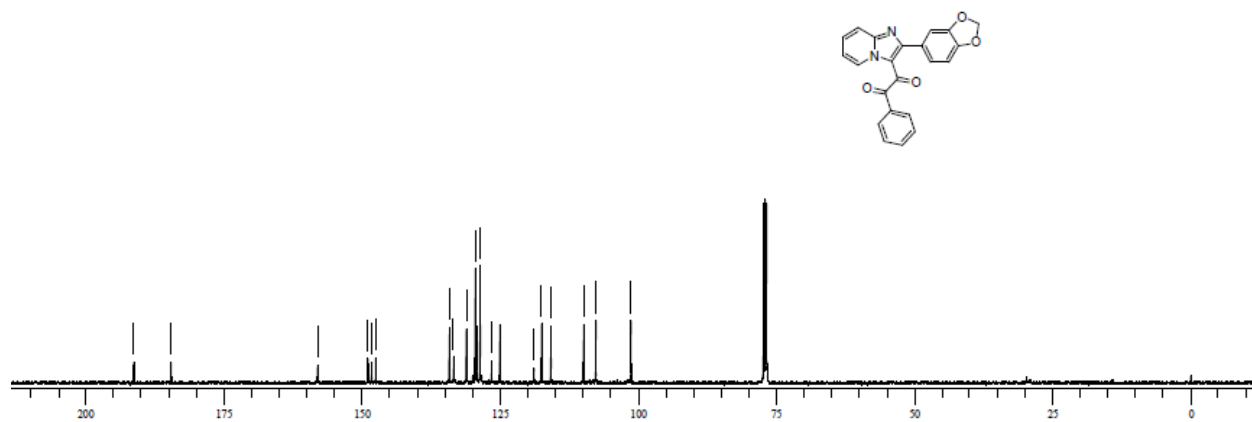

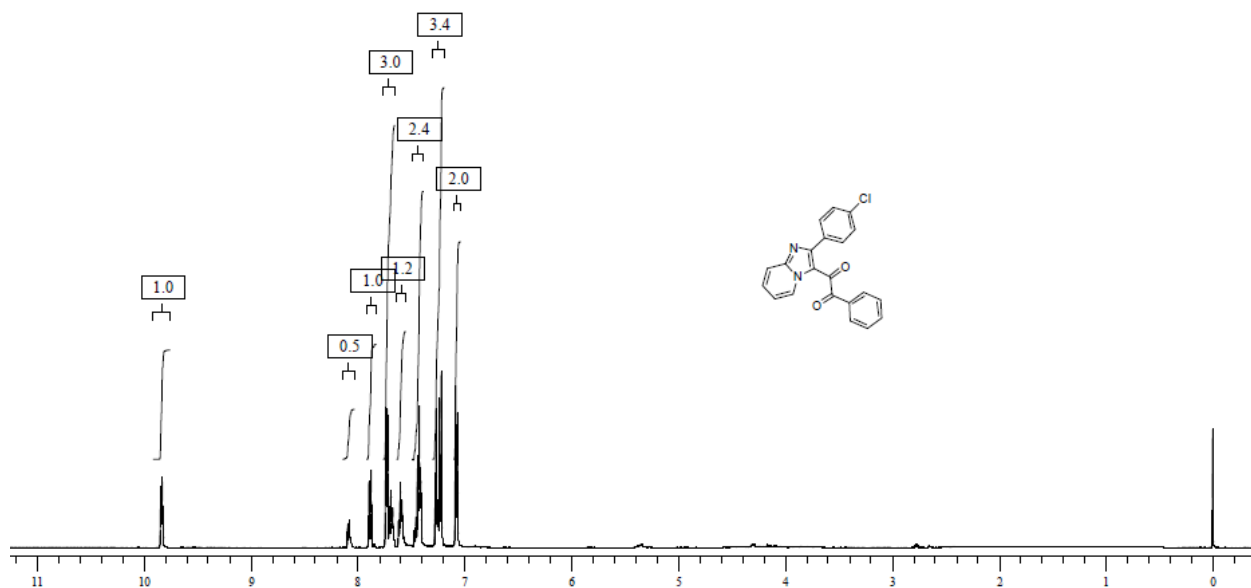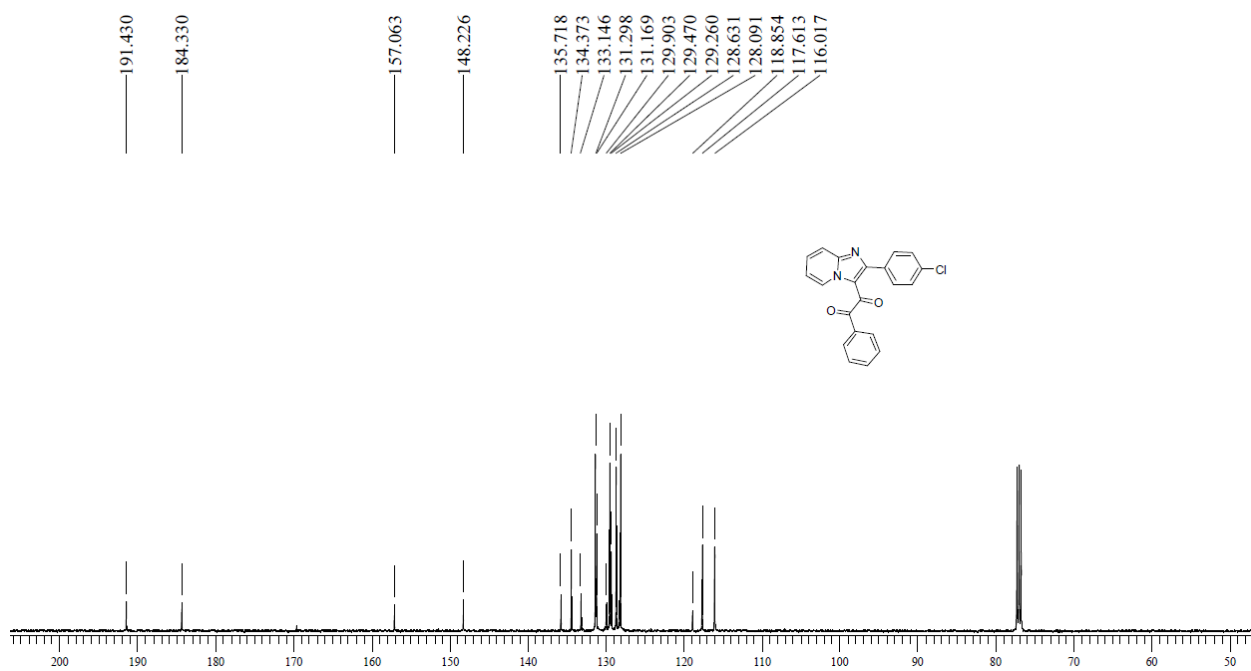

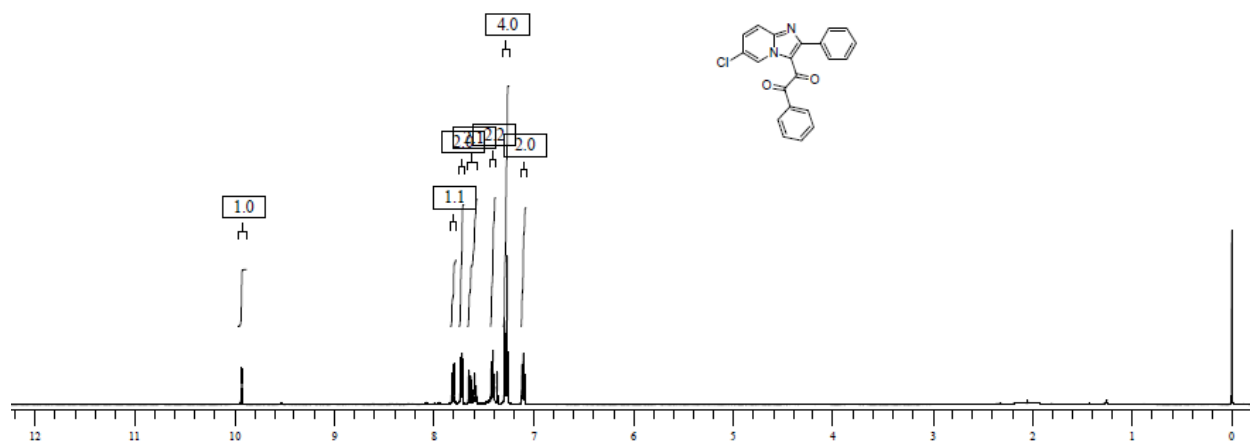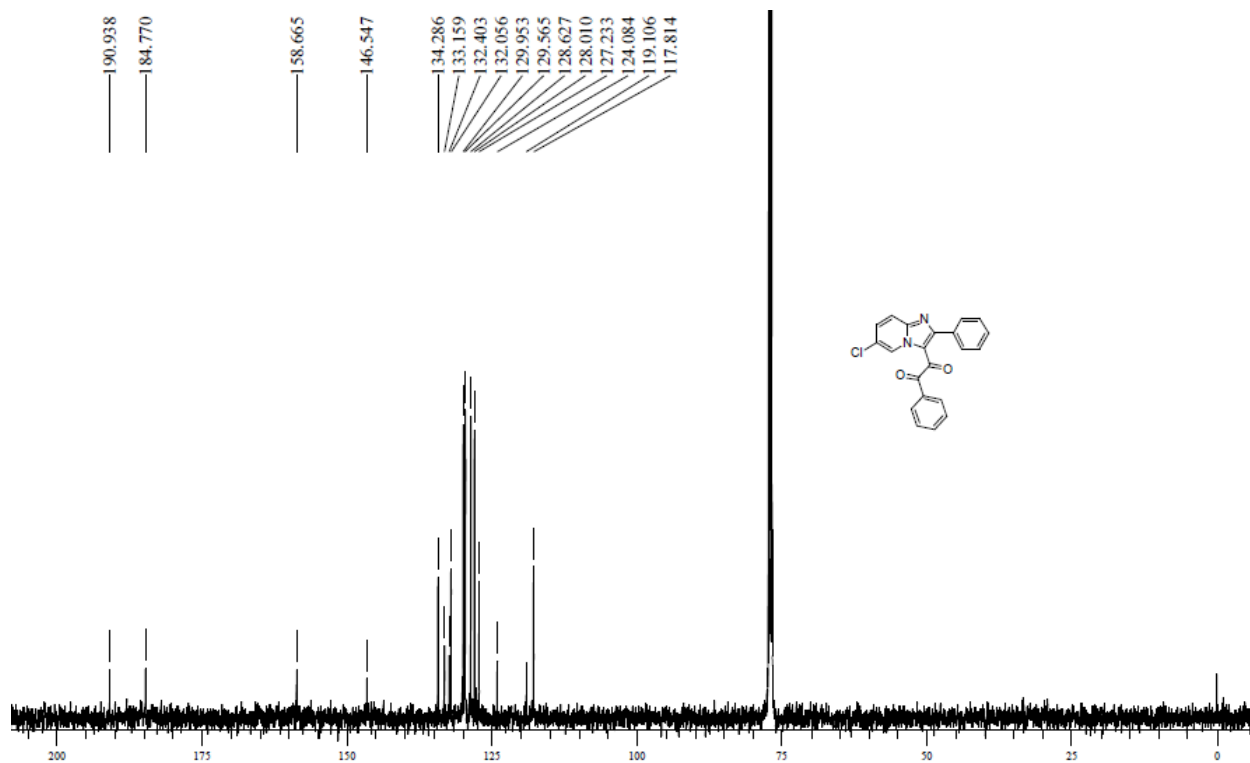

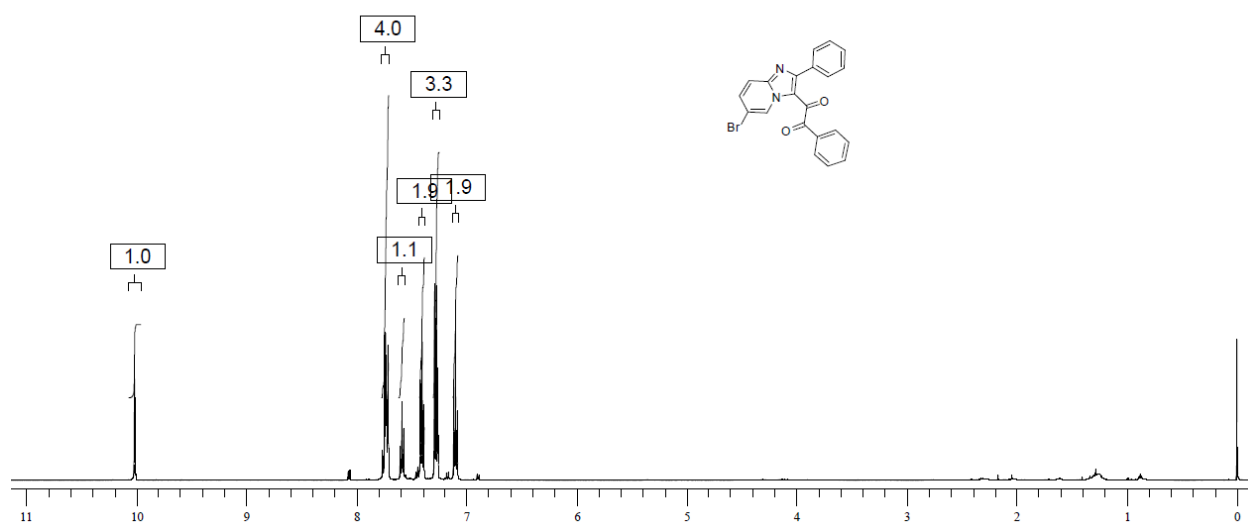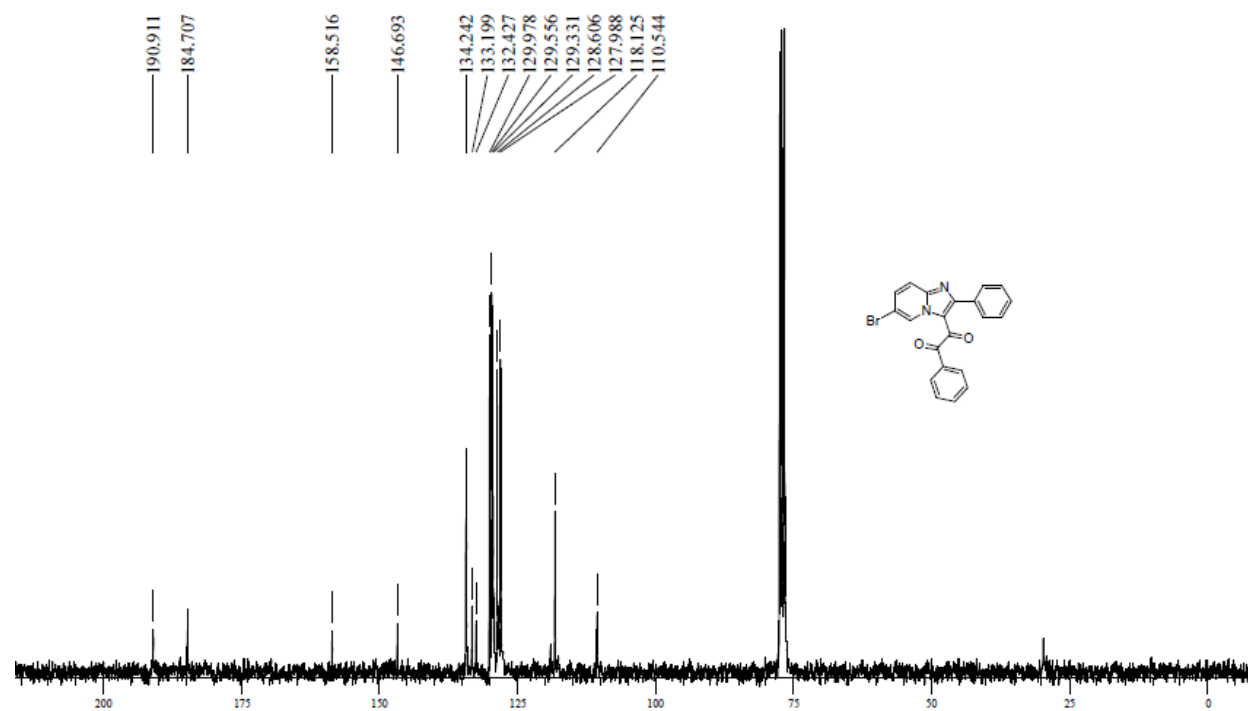

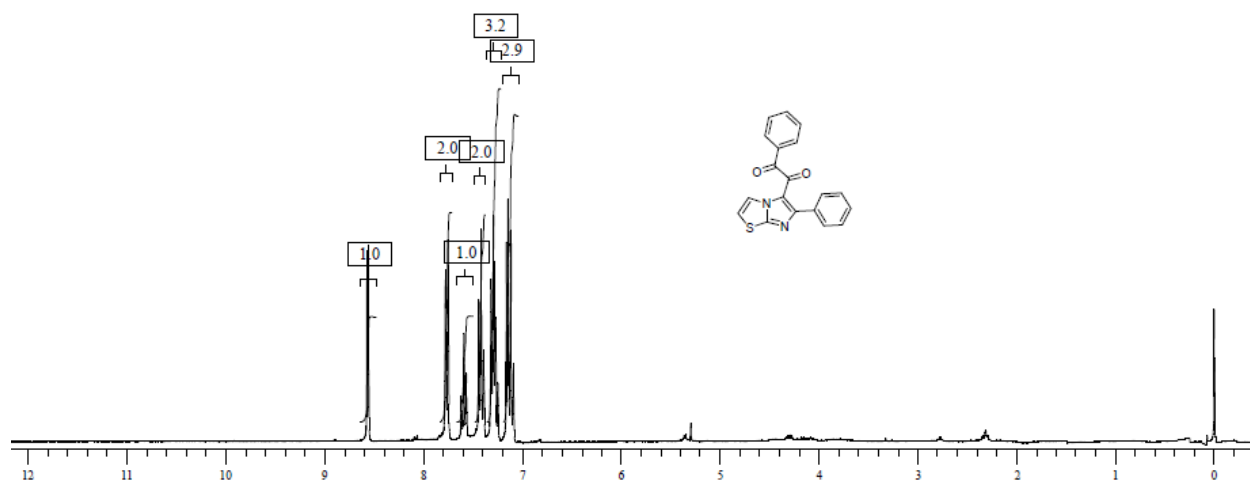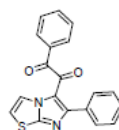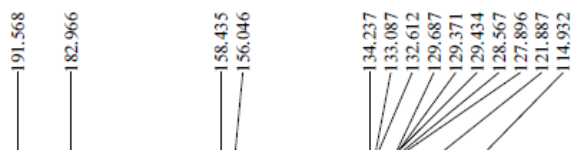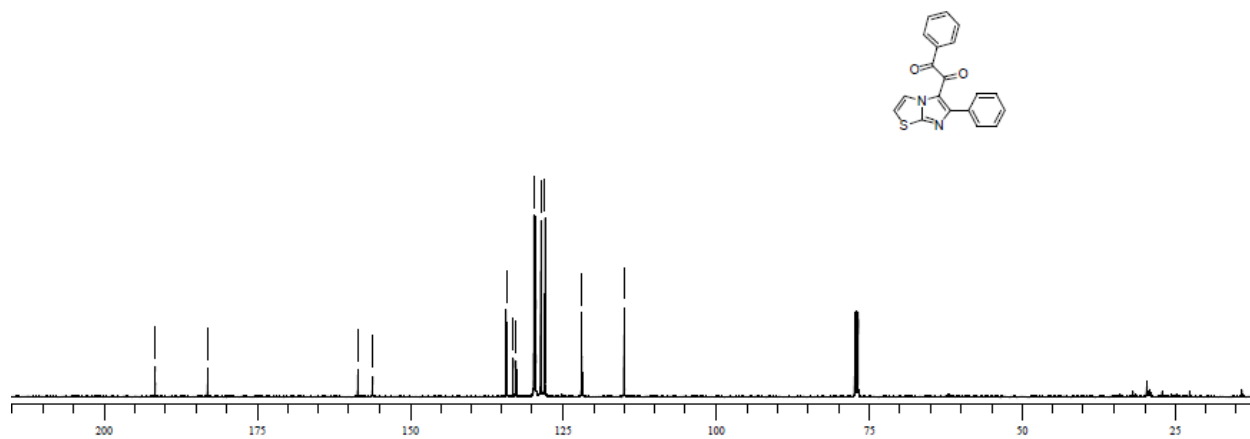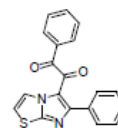



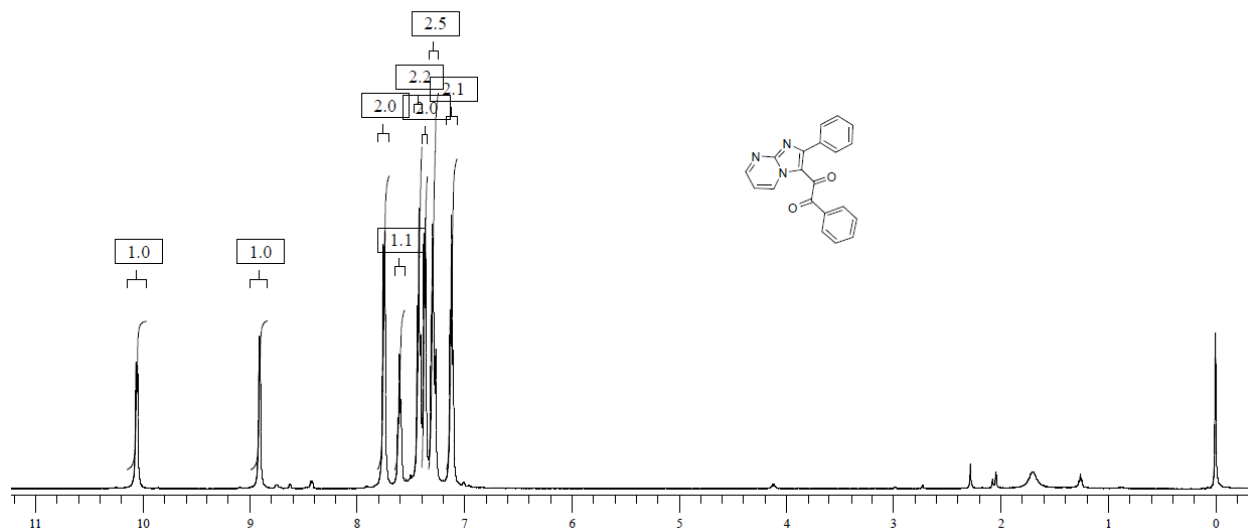

**<sup>1</sup>H NMR(500 MHz) Spectrum Of Compound 3ia In CDCl<sub>3</sub>**

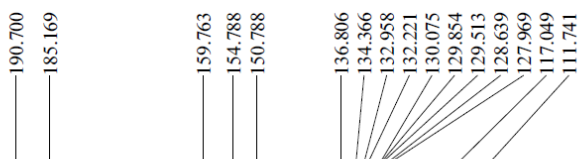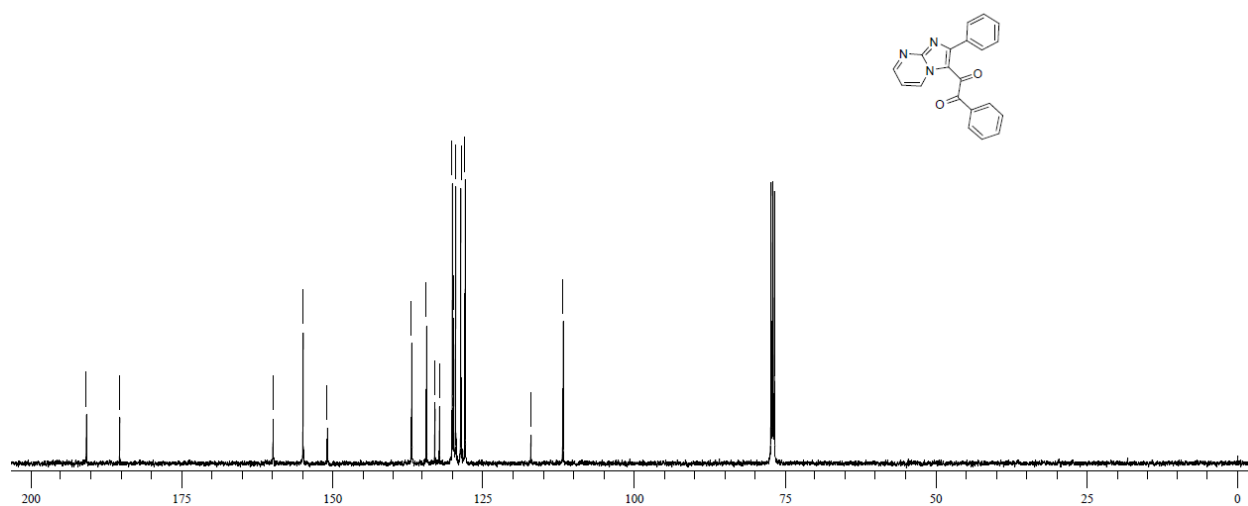

**<sup>13</sup>C NMR (75 MHz) Spectrum Of Compound 3ia In CDCl<sub>3</sub>.**
